# Supplementary material for: An improved synthesis of pyrido[2,3-d]pyrimidin-4(1H)-ones and their antimicrobial activity
Source: Royal Society of Chemistry journal article supplement (doi:10.1039/c8ob00627j), 2018-01-01

## Supporting Information for

### **An improved synthesis of pyrido[2,3-*d*]pyrimidin-4(1*H*)- ones and their antimicrobial activity**

Mohamed Fares <sup>a,b,\*</sup>, Soha R. Abd El Hadi <sup>b</sup>, Radwa A. Eladwy <sup>c</sup>, Aly A. Shoun <sup>d</sup>, Marwa M. Abdel-Aziz <sup>e</sup>, Wagdy M. Eldehna <sup>f</sup>, Hatem A. Abdel-Aziz <sup>g</sup>, Paul A. Keller <sup>a,\*</sup>

<sup>a</sup> School of Chemistry, University of Wollongong, Wollongong 2522, New South Wales, Australia

<sup>b</sup> Department of Pharmaceutical Chemistry, Faculty of Pharmacy, Egyptian Russian University, Badr City, Cairo, 11829, Egypt

<sup>c</sup> Department of Pharmacology and Toxicology, Faculty of Pharmacy, Egyptian Russian University, Badr City, Cairo 11829, Egypt

<sup>d</sup> Department of Microbiology & Immunology, Faculty of Pharmacy, Badr University in Cairo, Cairo, Egypt

<sup>e</sup> The Regional Center for Mycology and Biotechnology, Al-Azhar University, Cairo 11759, Egypt

<sup>f</sup> Department of Pharmaceutical Chemistry, Faculty of Pharmacy, Kafrelsheikh University, Kafrelsheikh, Egypt

<sup>g</sup> Department of Applied Organic Chemistry, National Research Center, Dokki, Cairo 12622, Egypt

## Table of Contents

|                                                                 |      |
|-----------------------------------------------------------------|------|
| General methods and material .....                              | SI3  |
| General procedure for the preparation of propenones (3a-j)..... | SI3  |
| General procedure A for the preparation of 10a-j .....          | SI4  |
| Procedure B for the preparation of 10a.....                     | SI4  |
| Procedure C for the preparation of 10a .....                    | SI4  |
| Typical procedure for the preparation of 11.....                | SI8  |
| Typical procedure for the preparation of 12.....                | SI8  |
| Pharmacokinetic properties calculation .....                    | SI9  |
| Biological evaluation.....                                      | SI9  |
| <i>In vitro</i> cytotoxicity .....                              | SI10 |
| References.....                                                 | SI10 |
| NMR data of compounds 10a-j, 11 and 12 .....                    | SI11 |

## General methods and material

Melting points were measured with a Stuart apparatus and were uncorrected. Microwave reactions were carried out on a Discover SP - Microwave Synthesizer (CEM corporation, USA) with an emission frequency of 2455 MHz and 300 watts  $\pm 10\%$ . Reactions were monitored by TLC analysis using silica gel GF/UV 254. NMR spectra were recorded on Varian Gemini-300BB 300, 400 and 500 MHz FT-NMR spectrometers (Varian Inc., Palo Alto, CA) and Bruker 400 MHz FT-NMR spectrometer.  $^1\text{H}$  spectra were run at 300, 400 and 500 MHz and  $^{13}\text{C}$  spectra were run at 100 and 125 MHz, in deuterated dimethylsulfoxide ( $\text{DMSO}-d_6$ ). Chemical shifts ( $\delta_{\text{H}}$ ) are reported relative to TMS as internal standard and coupling constant ( $J$ ) values are reported in Hertz. The abbreviations used are as follows: s, singlet; d, doublet; t, triplet; m, multiplet. Microanalyses were carried out using Perkin Elmer PE 2400 CHN Elemental Analyzer and the results were within  $\pm 0.4\%$ . All reagents and solvents were purified and dried by standard techniques.

### General procedure for the preparation of propenones (3a-j)<sup>1</sup>

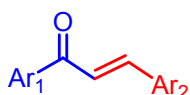

To a mixture of *p*-chloroacetophenone **1a** (154 mg, 1 mmole) or 2-acetyl thiophene **1b** (126 mg, 1 mmol) and the corresponding aldehyde **2a-e** (1 mmol) in methanol (5.0 mL), was slowly added a solution of potassium hydroxide (5%, 1.2 mL). The mixture was stirred at room temperature for 12 h and the resulting precipitate filtered, washed with water, air dried, and recrystallized from ethanol. Yield: 62 - 75%; Melting points were consistent with that reported.<sup>1</sup>

### Synthesis of 2-Amino-2-thiouracil **6**<sup>2</sup>

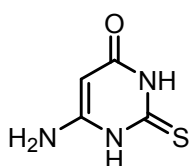

A sodium ethoxide solution was prepared by dissolving sodium (2.3 g, 0.1 mole) in absolute ethanol (150 mL). Thiourea **5** (3.8 g, 0.05 mole) was added with stirring until complete dissolution followed by the addition of ethyl cyanoacetate **4** (5.7 g, 0.05 mole) and the reaction mixture was heated at reflux for 4 h. After cooling, water was added dropwise till complete dissolution of the white precipitate. Ice was added and neutralization of the alkaline solution was accomplished by adding HCl (5 M) dropwise. The reaction flask left overnight at 0 °C and the resulting white precipitate was filtered, washed with water (3 x 30 mL), diethyl ether (2 x 30 mL) then air dried to give **6** (4.86 g, 68%) as a white powder. m.p  $>300$  °C as reported.<sup>2</sup>

**General procedure A: Preparation of 5-aryl-7-(thiophen-2-yl / 4-chlorophenyl)-2-thioxo-2,3-dihydropyrido[2,3-*d*]pyrimidin-4(1*H*)-one 10a-j**

A solution of 6-amino-2-thiouracil **6** (143 mg, 1 mmol) and the appropriate chalcone **3a-j** (1 mmol) in dry DMF (3 mL) was heated at reflux for 15-20 h and the reaction monitored by TLC analysis. The mixture was cooled overnight and the resulting solid filtered, dried and recrystallized from DMF to give the pyrido[2,3-*d*]pyrimidine derivatives **10a-j**.

**7-(4-Chlorophenyl)-5-phenyl-2-thioxo-2,3-dihydropyrido[2,3-*d*]pyrimidin-4(1*H*)-one 10a<sup>3</sup>**

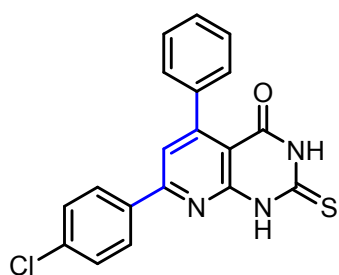

Using general procedure A and 1-(4-chlorophenyl)-3-phenylprop-2-en-1-one **3a** (243 mg, 1 mmole), compound **10a** (161 mg, 44%) was isolated as a buff solid. M.p. >300 °C; <sup>1</sup>H NMR (DMSO-*d*<sub>6</sub>)  $\delta$ : 7.42-7.45 (m, 5H, ArH), 7.58 (d, 2H, *J* = 8.5 Hz, ArH), 7.66 (s, 1H, ArH), 8.26 (d, 2H, *J* = 8.5 Hz, ArH), 12.37 (s, 1H, NH); 13.08 (s, 1H, NH); <sup>13</sup>C NMR (125 MHz, DMSO-*d*<sub>6</sub>)  $\delta$ : 108.2, 119.1, 127.4, 128.2, 128.7, 128.9, 129.4, 135.3, 135.7, 138.2, 152.6, 153.8, 157.9, 158.6, 175.4; MS (ESI), *m/z* 364 (100%) [*M*-H]<sup>-</sup>, 380 (70%) [*M* + Cl]; Anal. Calcd for C<sub>19</sub>H<sub>12</sub>ClN<sub>3</sub>OS: C, 62.38; H, 3.31; N, 11.49. Found: C, 62.56; H, 3.51; N, 11.26.

**Procedure B:** A solution of 6-amino-2-thiouracil **6** (143 mg, 1 mmol) and 1-(4-chlorophenyl)-3-phenylprop-2-en-1-one **3a** (242 mg, 1 mmol) in TFA (3 mL) was heated at reflux for 12 h and the reaction monitored by TLC analysis. The mixture was cooled, left overnight and the resulting solid filtered, washed with water (3 x 5 mL) then diethyl ether (2 x 5 mL) and dried to give **10a** (102 mg, 28%).

**Procedure C:** A solution of 6-amino-2-thiouracil **6** (72 mg, 0.5 mmol) and 1-(4-chlorophenyl)-3-phenylprop-2-en-1-one **3a** (121 mg, 0.5 mmol), iodine pellets (6.4 mg, 0.05 mmol) in dry DMF (2 mL) was subjected to microwave radiation in a sealed tube and the reaction monitored by TLC analysis. The mixture was cooled, the lid was removed, left overnight and the resulting solid filtered and dried (108 mg, 59%).

**7-(4-Chlorophenyl)-5-(4-fluorophenyl)-2-thioxo-2,3-dihydropyrido[2,3-*d*]pyrimidin-4(1*H*)-one 10b**

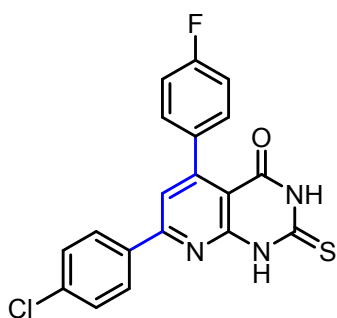

Using general procedure A and 1-(4-chlorophenyl)-3-(4-fluorophenyl)prop-2-en-1-one **3b** (261 mg, 1 mmole), compound

**10b** (199 mg, 52%) was synthesized as a buff solid. M.p. >300 °C;  $^1\text{H}$  NMR (DMSO- $d_6$ )  $\delta$ : 7.22 (t, 2H,  $J = 8.8$  Hz ArH), 7.49 (dd, 2H,  $J = 6.0, 5.5$  Hz, ArH), 7.58 (d, 2H,  $J = 8.8$  Hz, ArH), 7.67 (s, 1H, pyridine H), 8.25 (d, 2H,  $J = 8.8$  Hz, ArH), 12.38 (s, 1H, -NH, D $_2$ O exchangeable); 13.08 (s, 1H, -NH, D $_2$ O exchangeable);  $^{13}\text{C}$  NMR (125 MHz, DMSO- $d_6$ )  $\delta$ : 108.3, 114.2 ( $^2J_{\text{F-C}} = 20.9$  Hz), 119.1, 128.9, 129.3, 131.0 ( $^3J_{\text{F-C}} = 8.6$  Hz), 134.4, 135.3, 135.8, 152.6, 152.7, 158.0, 158.7, 161.3 ( $^1J_{\text{F-C}} = 243.1$  Hz), 175.4; MS (ESI $^-$ ),  $m/z$  382 (100%) [ $^{35}\text{Cl}$ , M-H] $^-$ , 384 (33%) [ $^{37}\text{Cl}$ , M-H] $^-$ ; Anal. Calcd for C $_{19}$ H $_{11}$ ClFN $_3$ OS: C, 59.46; H, 2.89; N, 10.95. Found: C, 59.70; H, 3.11; N, 11.26.

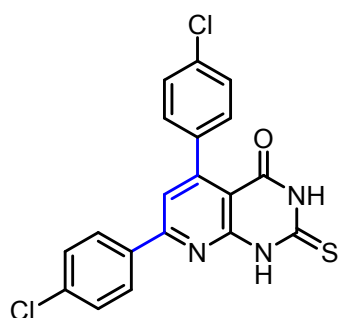

**5,7-Bis(4-chlorophenyl)-2-thioxo-2,3-dihydropyrido[2,3-d]pyrimidin-4(1H)-one 10c**

Using general procedure A and 1,3-bis(4-chlorophenyl)prop-2-en-1-one **3c** (277 mg, 1 mmole), compound **10c** (200 mg, 50%) was synthesized as a buff solid. M.p. >300 °C;  $^1\text{H}$  NMR (DMSO- $d_6$ )  $\delta$ : 7.46-7.50 (m, 4H, ArH), 7.58 (d, 2H,  $J = 8.3$  Hz, ArH), 7.68 (s, 1H, pyridine H), 8.25 (d, 2H,  $J = 8.3$  Hz, ArH), 12.41 (s, 1H, -NH, D $_2$ O exchangeable), 13.10 (s, 1H, -NH, D $_2$ O exchangeable);  $^{13}\text{C}$  NMR (125 MHz, DMSO- $d_6$ )  $\delta$ : 108.2, 118.9, 127.4, 128.9, 129.3, 130.6, 133.1, 135.2, 135.8, 137.1, 152.4, 152.6, 158.0, 158.7, 175.4; MS (ESI $^-$ ),  $m/z$  398 (100%) [ $^{35}\text{Cl}$ ,  $^{35}\text{Cl}$ , M-H] $^-$ , 400 (70%) [ $^{37}\text{Cl}$ ,  $^{35}\text{Cl}$ , M-H] $^-$ ; Anal. Calcd for C $_{19}$ H $_{11}$ Cl $_2$ N $_3$ OS: C, 57.01; H, 2.77; N, 10.50. Found: C, 57.32; H, 2.85; N, 10.36.

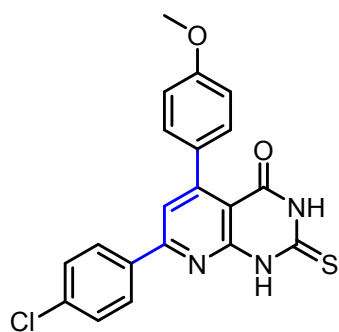

**7-(4-Chlorophenyl)-5-(4-methoxyphenyl)-2-thioxo-2,3-dihydropyrido[2,3-d]pyrimidin-4(1H)-one 10d**

Using general procedure A and 1-(4-chlorophenyl)-3-(4-methoxyphenyl)prop-2-en-1-one **3d** (273 mg, 1 mmole), compound **10d** (181 mg, 46%) was synthesized as a buff solid. M.p. >300 °C;  $^1\text{H}$  NMR (DMSO- $d_6$ )  $\delta$ : 3.81 (s, 3H, OCH $_3$ ), 6.94 (d, 2H,  $J = 8.0$  Hz, ArH), 7.39 (d, 2H,  $J = 8.0$  Hz, ArH), 7.41 (d, 2H,  $J = 8.0$  Hz, ArH), 7.54 (s, 1H, pyridine H), 8.20 (d, 2H,  $J = 8.0$  Hz, ArH), 12.37 (s, 1H, -NH, D $_2$ O exchangeable), 12.02 (s, 1H, -NH, D $_2$ O exchangeable);  $^{13}\text{C}$  NMR (100 MHz, DMSO- $d_6$ )  $\delta$ : 55.7, 108.6, 113.4, 119.6, 129.4, 129.8, 130.7, 131.0, 135.9, 136.1, 153.2, 154.1, 158.3, 159.2, 160.1, 175.8; MS (EI),  $m/z$  395 (82%) [ $^{35}\text{Cl}$ , M] $^+$ , 397 (17%) [ $^{37}\text{Cl}$ , M] $^+$ ; Anal. Calcd for C $_{20}$ H $_{14}$ ClN $_3$ O $_2$ S: C, 60.68; H, 3.56; N, 10.62. Found: C, 60.93; H, 3.78; N, 10.98.

**7-(4-Chlorophenyl)-5-(4-nitrophenyl)-2-thioxo-2,3-dihydropyrido[2,3-*d*]pyrimidin-4(1*H*)-one 10e**

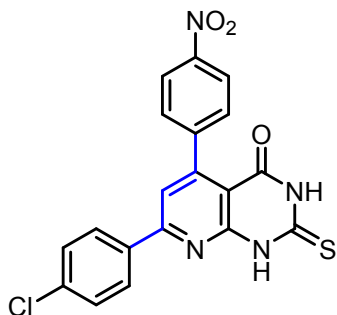

Using general procedure A and 1-(4-chlorophenyl)-3-(4-nitrophenyl)prop-2-en-1-one **3e** (288 mg, 1 mmole), compound **10e** (250 mg, 61%) was synthesized as a buff solid. M.p. >300 °C; <sup>1</sup>H NMR (DMSO-*d*<sub>6</sub>) δ: 7.62 (d, 2H, *J* = 8.8 Hz, ArH), 7.73 (d, 2H, *J* = 8.8 Hz, ArH), 7.76 (s, 1H, pyridine H), 8.27-8.35 (m, 4H, ArH), 12.48 (s, 1H, -NH, D<sub>2</sub>O exchangeable), 13.19 (s, 1H, -NH, D<sub>2</sub>O exchangeable); <sup>13</sup>C NMR (100 MHz, DMSO-*d*<sub>6</sub>) δ: 108.7, 119.0, 123.0, 129.5, 129.9, 130.6, 135.6, 136.4, 145.7, 147.7, 151.8, 153.0, 158.8, 159.2, 176.0; MS (EI), *m/z* 410 (100%) [<sup>35</sup>Cl, M<sup>+</sup>], 412 (39%) [<sup>37</sup>Cl, M]<sup>+</sup>.

**5-Phenyl-7-(thiophen-2-yl)-2-thioxo-2,3-dihydropyrido[2,3-*d*]pyrimidin-4(1*H*)-one 10f<sup>†</sup>**

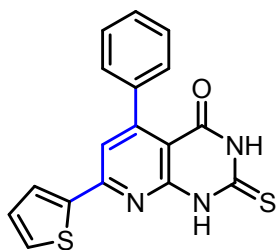

Using general procedure A and 3-phenyl-1-(thiophen-2-yl)prop-2-en-1-one **3f** (214 mg, 1 mmole), compound **10f** (219 mg, 65%) was synthesized as a buff solid. M.p. >300 °C; <sup>1</sup>H NMR (DMSO-*d*<sub>6</sub>) δ: 7.18-7.19 (m, 1H, H4 thiophene), 7.38-7.52 (m, 5H, ArH), 7.59-7.70 (m, 1H, H5 thiophene), 7.92 (s, 1H, pyridine H), 8.07-8.15 (m, 1H, H3 thiophene), 12.29 (br. s, 1H, NH, D<sub>2</sub>O exchangeable), 13.05 (br. s, 1H, NH, D<sub>2</sub>O exchangeable); <sup>13</sup>C NMR (100 MHz, DMSO-*d*<sub>6</sub>) δ: 108.0, 118.1, 127.9, 128.6, 129.0, 129.4, 129.6, 132.5, 138.8, 142.8, 153.1, 154.0, 155.4, 158.9, 175.9; MS (EI), *m/z* 337 (100%) [M<sup>+</sup>], 338 (30%) [M+1]<sup>+</sup>; Anal. Calcd for C<sub>17</sub>H<sub>11</sub>N<sub>3</sub>OS<sub>2</sub>: C, 60.52; H, 3.29; N, 12.45. Found: C, 60.30; H, 3.26; N, 12.59.

**5-(4-Fluorophenyl)-7-(thiophen-2-yl)-2-thioxo-2,3-dihydropyrido[2,3-*d*]pyrimidin-4(1*H*)-one 10g**

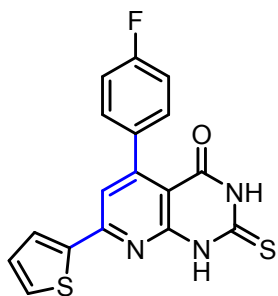

Using general procedure A and 3-(4-fluorophenyl)-1-(thiophen-2-yl)prop-2-en-1-one **3g** (232 mg, 1 mmole), compound **10g** (202 MG, 57%) was synthesized as a buff solid. M.p. >300 °C; <sup>1</sup>H NMR (DMSO-*d*<sub>6</sub>) δ: 7.06-7.13 (m, 3H, 2ArH and H4 thiophene), 7.33 (t, 2H, *J* = 6.0 Hz, ArH), 7.46 (s, 1H, pyridine H), 7.68 (d, 1H, *J* = 4.0 Hz, H5 thiophene), 7.93 (d, 1H, *J* = 4.0 Hz, H3 thiophene), 12.22 (br. s, 1H, NH, D<sub>2</sub>O exchangeable), 12.90 (br. s, 1H, NH, D<sub>2</sub>O exchangeable); <sup>13</sup>C NMR (100 MHz, DMSO-*d*<sub>6</sub>) δ: 108.0, 114.7 (<sup>2</sup>*J*<sub>F-C</sub> = 20.9 Hz), 118.1, 129.4, 129.7, 131.3 (<sup>3</sup>*J*<sub>F-C</sub> = 9.0 Hz), 132.3, 135.0, 142.8, 152.9, 153.1, 155.5, 159.0, 161.5 (<sup>1</sup>*J*<sub>F-C</sub> = 240.0 Hz), 175.9; MS (EI), *m/z* 355 (100%) [M<sup>+</sup>], 356 (17%) [M+1]<sup>+</sup>; Anal. Calcd for C<sub>17</sub>H<sub>10</sub>FN<sub>3</sub>OS<sub>2</sub>: C, 57.45; H, 2.84; N, 11.82. Found: C, 57.64; H, 2.61; N, 12.09.

**5-(4-Chlorophenyl)-7-(thiophen-2-yl)-2-thioxo-2,3-dihydropyrido[2,3-*d*]pyrimidin-4(1*H*)-one 10h**

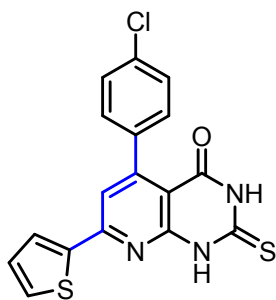

Using general procedure A and 3-(4-chlorophenyl)-1-(thiophen-2-yl)prop-2-en-1-one **3h** (249 mg, 1 mmole), compound **10h** (159 mg, 43%) was synthesized as a buff solid. M.p. >300 °C; <sup>1</sup>H NMR (DMSO-*d*<sub>6</sub>) δ: 7.20 (d, *J* = 3.9 Hz, 1H, H4 thiophene), 7.23 (d, *J* = 8.7 Hz, 2H, ArH), 7.45-7.59 (m, 3H, 2ArH and H5 thiophene), 7.81 (d, *J* = 4.8 Hz, 1H, H3 thiophene), 8.07 (s, 1H, pyridine H), 12.23 (br. s, 1H, NH, D<sub>2</sub>O exchangeable), 12.95 (br s, 1H, NH, D<sub>2</sub>O exchangeable); <sup>13</sup>C NMR (100 MHz, DMSO-*d*<sub>6</sub>) δ: 108.0, 117.9, 127.9, 129.4, 131.0, 132.4, 133.5, 137.6, 142.8, 152.6, 153.1, 155.5, 159.0, 162.1, 175.9; MS (EI), *m/z* 371 (100%) [<sup>35</sup>Cl, M<sup>+</sup>], 373 (39) [<sup>37</sup>Cl, M]<sup>+</sup>; Anal. Calcd for C<sub>17</sub>H<sub>10</sub>ClN<sub>3</sub>OS<sub>2</sub>: C, 54.91; H, 2.71; N, 11.30. Found: C, 54.72; H, 2.56; N, 11.56.

**5-(4-Methoxyphenyl)-7-(thiophen-2-yl)-2-thioxo-2,3-dihydropyrido[2,3-*d*]pyrimidin-4(1*H*)-one 10i**

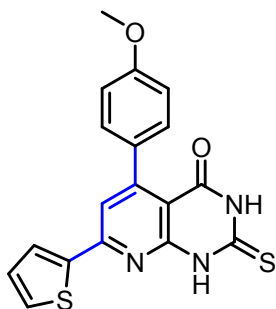

Using general procedure A and 3-(4-methoxyphenyl)-1-(thiophen-2-yl)prop-2-en-1-one **3i** (244 mg, 1 mmole), compound **10i** (146 mg, 40%) was synthesized as a buff solid. M.p. >300 °C; <sup>1</sup>H NMR (DMSO-*d*<sub>6</sub>) δ: 3.82 (s, 3H, OCH<sub>3</sub>), 6.96 (d, *J* = 8.7 Hz, 2H, ArH), 7.20 (dd, *J* = 3.9, 4.8 Hz, 1H, H4 thiophene), 7.37 (d, *J* = 8.7 Hz, 2H, ArH), 7.56 (s, 1H, pyridine H), 7.81 (d, *J* = 4.8 Hz, 1H, H5 thiophene), 8.06-8.08 (m, 1H, H3 thiophene), 12.23 (br. s, 1H, NH, D<sub>2</sub>O exchangeable), 12.90 (br. s, 1H, NH, D<sub>2</sub>O exchangeable); <sup>13</sup>C NMR (100 MHz, DMSO-*d*<sub>6</sub>) δ: 55.7, 107.9, 113.4, 118.1, 129.4, 129.5, 130.7, 130.8, 132.1, 142.9, 153.2, 153.8, 155.2, 159.0, 160.0, 175.8; MS (EI), *m/z* 367 (100%) [M<sup>+</sup>]; Anal. Calcd for C<sub>18</sub>H<sub>13</sub>N<sub>3</sub>O<sub>2</sub>S<sub>2</sub>: C, 58.84; H, 3.57; N, 11.44. Found: C, 59.02; H, 3.74; N, 11.30.

**5-(4-Nitrophenyl)-7-(thiophen-2-yl)-2-thioxo-2,3-dihydropyrido[2,3-*d*]pyrimidin-4(1*H*)-one 10j**

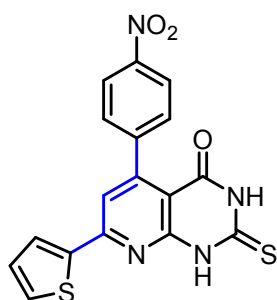

Using general procedure A and 3-(4-nitrophenyl)-1-(thiophen-2-yl)prop-2-en-1-one **3j** (259 mg, 1 mmole), compound **10j** (191 mg, 50%) was synthesized as a buff solid. M.p. >300 °C; <sup>1</sup>H NMR (DMSO-*d*<sub>6</sub>) δ: 7.21 (dd, *J* = 3.9, 1.2 Hz, 1H, H4 thiophene), 7.66-7.67 (m, 1H, H5 thiophene), 7.68 (d, *J* = 8.7 Hz, 2H, ArH), 7.83 (d, *J* = 5.1 Hz, 1H, H3 thiophene), 8.07 (s, 1H, pyridine H), 8.26 (d, *J* = 8.7 Hz, 2H, ArH), 12.34 (br. s, 1H, NH, D<sub>2</sub>O exchangeable), 13.05 (br. s, 1H, NH, D<sub>2</sub>O exchangeable); <sup>13</sup>C NMR (100 MHz, DMSO-*d*<sub>6</sub>)

$\delta$ : 107.9, 117.5, 123.0, 124.4, 126.4, 129.5, 130.4, 130.5, 132.6, 147.7, 151.5, 153.0, 155.8, 159.1, 176.0; MS (EI),  $m/z$  382 (100%) [ $M^+$ ], 383 (37%) [ $M+1$ ] $^+$ ; Anal. Calcd for  $C_{18}H_{13}N_3O_2S_2$ : C, 58.84; H, 3.57; N, 11.44. Found: C, 58.98; H, 3.86; N, 11.62.

### 7-(4-Chlorophenyl)-2-(dimethylamino)-5-phenylpyrido[2,3-*d*]pyrimidin-4(3*H*)-one **11**

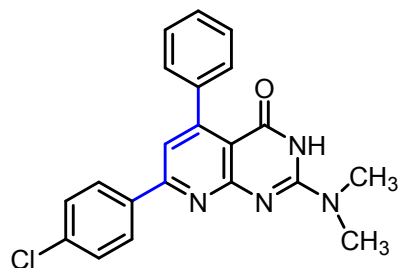

A solution of 6-amino-2-thiouracil **6** (72 mg, 0.5 mmol), 1-(4-chlorophenyl)-3-phenylprop-2-en-1-one **3a** (121 mg, 0.5 mmol) and iodine (25 mg, 40 mol%) in dry DMF (2 mL) was subjected to microwave radiation for 1 h in a sealed tube and the reaction monitored by TLC analysis. The mixture was cooled, the lid was removed, left overnight and the resulting solid was subjected to flash chromatography (methanol/dichloromethane, 1:10) to give **11** (73 mg, 39%) as a yellow powder, M.p. >300 °C;  $^1H$  NMR (DMSO- $d_6$ )  $\delta$ : 3.14 (s, 6H, 2CH<sub>3</sub>), 7.39-7.45 (m, 6H, 5ArH and pyridine H), 7.54 (d,  $J$  = 8.3 Hz, 2H, ArH), 8.22 (d,  $J$  = 8.3 Hz, 2H, ArH), 11.20 (s, 1H, NH);  $^{13}C$  NMR (125 MHz, DMSO- $d_6$ )  $\delta$ : 38.0, 107.7, 117.5, 126.0, 127.8, 128.2, 129.0, 129.2, 129.7, 135.5, 137.0, 140.2, 153.6, 153.8, 158.7, 163.1; MS (ESI $^+$ ),  $m/z$  377 (100%) [ $^{35}Cl$ ,  $M+H$ ] $^+$ , 379 32% [ $^{37}Cl$ ,  $M+H$ ] $^+$ ; HRMS (ESI $^+$ ) calcd for  $C_{21}H_{17}ClN_4O$ +H: 377.1187; found 377.1169.

### 2-Amino-7-(4-chlorophenyl)-5-phenylpyrido[2,3-*d*]pyrimidin-4(3*H*)-one **12**

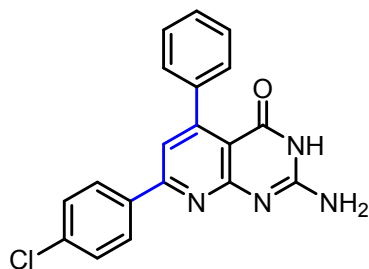

A solution of 6-amino-2-thiouracil **6** (72 mg, 0.5 mmol), 1-(4-chlorophenyl)-3-phenylprop-2-en-1-one **3a** (121 mg, 0.5 mmol) and iodine (25 mg, 40 mol%) in formamide (2 mL) was subjected to microwave radiation for 1 h in a sealed tube and the reaction monitored by TLC analysis. The mixture was cooled, the lid was removed, left overnight and the resulting solid was subjected to flash chromatography (methanol/dichloromethane, 1:10) to give **12** (60 mg, 34%) as a brown powder. M.p. >300 °C;  $^1H$  NMR (DMSO- $d_6$ )  $\delta$ : 6.69 (s, 2H, NH<sub>2</sub>), 7.39-7.54 (m, 6H, 5ArH and pyridine H), 7.54 (d,  $J$  = 8.3 Hz, 2H, ArH), 8.21 (d,  $J$  = 8.3 Hz, 2H, ArH), 10.95 (s, 1H, NH);  $^{13}C$  NMR (125 MHz, DMSO- $d_6$ )  $\delta$ : 108.5, 117.3, 127.7, 128.0, 129.0, 129.2, 129.5, 135.4, 137.1, 140.4, 153.7, 154.7, 158.4, 163.4, 163.5; MS (ESI $^+$ ),  $m/z$  349 (100%) [ $^{35}Cl$ ,  $M+H$ ] $^+$ , 351 (35%) [ $^{37}Cl$ ,  $M+H$ ] $^+$ ; HRMS (ESI $^+$ ) calcd for  $C_{19}H_{13}^{35}ClN_4O$  + Na: 371.0669; found 371.0676.

### Pharmacokinetic properties calculation

The drug likeness, HBD and HBA scores of all the compounds **10a-j** were calculated using the MolSoft online calculation kits. Prediction of the lipophilicity was performed using ALOGPS



2.1 program <sup>5</sup>, while calculation of TPSA, the number of rotatable bonds, used the Molinspiration property calculation kit.<sup>6</sup> Reduced molecular flexibility is measured by the number of rotatable bonds and is greatly linked to oral bioavailability. The number of rotatable bonds less or equal to ten potentially increases the oral bioavailability. %ABS is inversely proportional to the molecular volume and TPSA and is calculated using the formula  $\%ABS = 109 \pm 0.345 \times TPSA$ .

## **Biological evaluation**

### **Antimicrobial activity**

All strains were provided by the Regional Center for Mycology and Biotechnology (RCMB), Al-Azhar University, Cairo, Egypt. Antibacterial and antifungal activities were expressed as the diameter of inhibition zones from an agar well diffusion method. Holes (1 cm diameter) were created in the agar using a sterile cork borer in either sterile malt agar plates (fungi) or sterile nutrient agar plates (bacteria), which had previously been uniformly seeded with microorganisms. The holes were filled with fungal filtrates (100  $\mu$ L). Plates were left in an incubator at 4 °C for one hour for diffusion and then incubated at 37 °C for bacteria and 28 °C for fungi. Inhibition zones were measured after 24 h of incubation for bacteria and 48 h of incubation for fungi. Amphotericin B was the antifungal standard, whereas ampicillin, gentamycin and vancomycin served as standards for Gram +ve, Gram -ve, and methicillin resistant *Staphylococcus aureus*, respectively. The experiments were performed in triplicate and the average zone of inhibition was calculated.

### **Minimum inhibitory concentration**

MIC was performed using a serial dilution technique starting with 100 mmol concentration of compounds dissolved in DMSO (1 mL) and then reduced by successive twofold dilutions of stock solution using a calibrated micropipette. Amphotericin B was used as the antifungal standard and ampicillin, gentamycin and vancomycin served as standards for Gram +ve, Gram -ve, and methicillin resistant *Staphylococcus aureus*, respectively. The final solution concentrations were 62.50, 31.25, 15.63, 7.81, 3.90, 1.95, 0.98, 0.49, 0.24 and 0.12  $\mu$ mol/mL. The microtiter plates were incubated at 37 °C for bacteria and 28 °C for fungi and were read using a microplate reader after 24 h for bacteria and after 48 h for fungi. In each case, triplicate tests were performed and the average was taken as final reading. MIC was expressed as the lowest concentration inhibiting test organism's growth.

### **In vitro cytotoxicity**

CCD-33Co (normal colon cells) were obtained from the American Type Culture Collection. Cells were propagated in DMEM supplemented with 10% heat-inactivated FBS (Hyclone), 10  $\mu$ g/mL

of insulin (Sigma), and 1% penicillin-streptomycin. All other chemicals and reagents were purchased from Sigma, or Invitrogen. Cytotoxicity was determined using a MTT assay following a reported procedure.<sup>7</sup> The 50% inhibitory concentration (IC<sub>50</sub>) was estimated from graphic plots of the dose response curve for each conc. using Graphpad Prism software (San Diego, CA. USA). The data presented are the mean of three separate experiments.

## References:

1. Y. Qian, G.-Y. Ma, Y. Yang, K. Cheng, Q.-Z. Zheng, W.-J. Mao, L. Shi, J. Zhao and H.-L. Zhu, *Biorg. Med. Chem.*, 2010, **18**, 4310-4316.
2. T. Elsaman, M. Fares, H. A. Abdel-Aziz, M. I. Attia, H. A. Ghabbour and K. M. Dawood, *J. Chem.*, 2013, **2013**.
3. J. Quiroga, B. Insuasty, A. Sanchez, M. Nogueras and H. Meier, *J. Heterocycl. Chem.*, 1992, **29**, 1045-1048.
4. M. Fares, S. M. Abou-Seri, H. A. Abdel-Aziz, S. E. Abbas, M. M. Youssef and R. A. Eladwy, *Eur. J. Med. Chem.*, 2014, **83**, 155-166.
5. I. V. Tetko and V. Y. Tachuk, <http://www.vcclab.org/lab/alogps/>.
6. M. Cheminformatics, <http://www.molinspiration.com/cgi-bin/properties>.
7. F. Denizot and R. Lang, *J. Immunol. Methods*, 1986, **89**, 271-277.

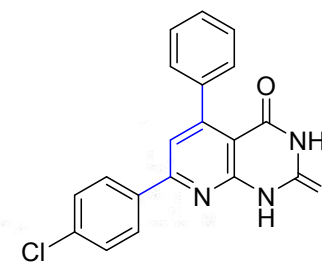

10a

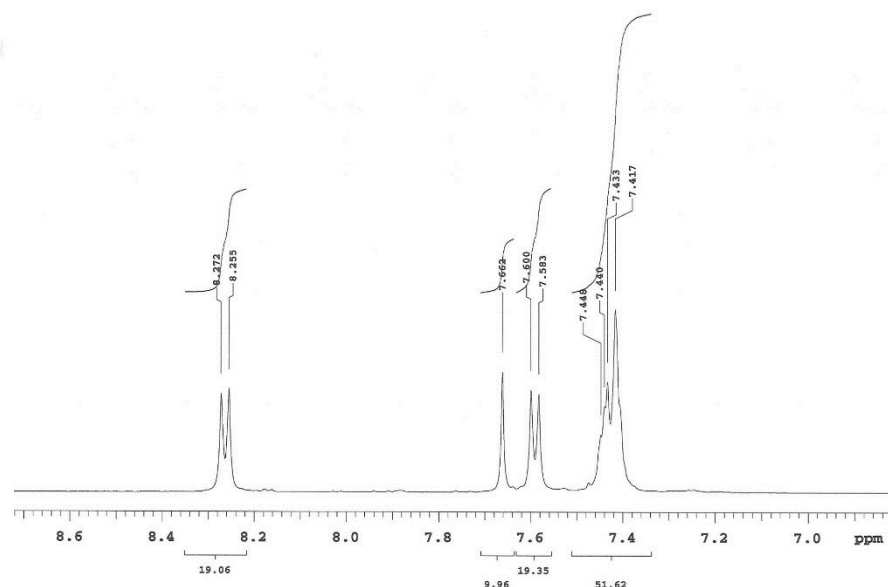

Pulse 45.0 degrees  
Acq. time 2.048 sec  
Width 7998.4 Hz  
Single scan  
OBSERVE H1, 499.9072837 MHz  
DATA PROCESSING  
Line broadening 0.5 Hz  
FT size 32768  
Total time 0 min 3 sec

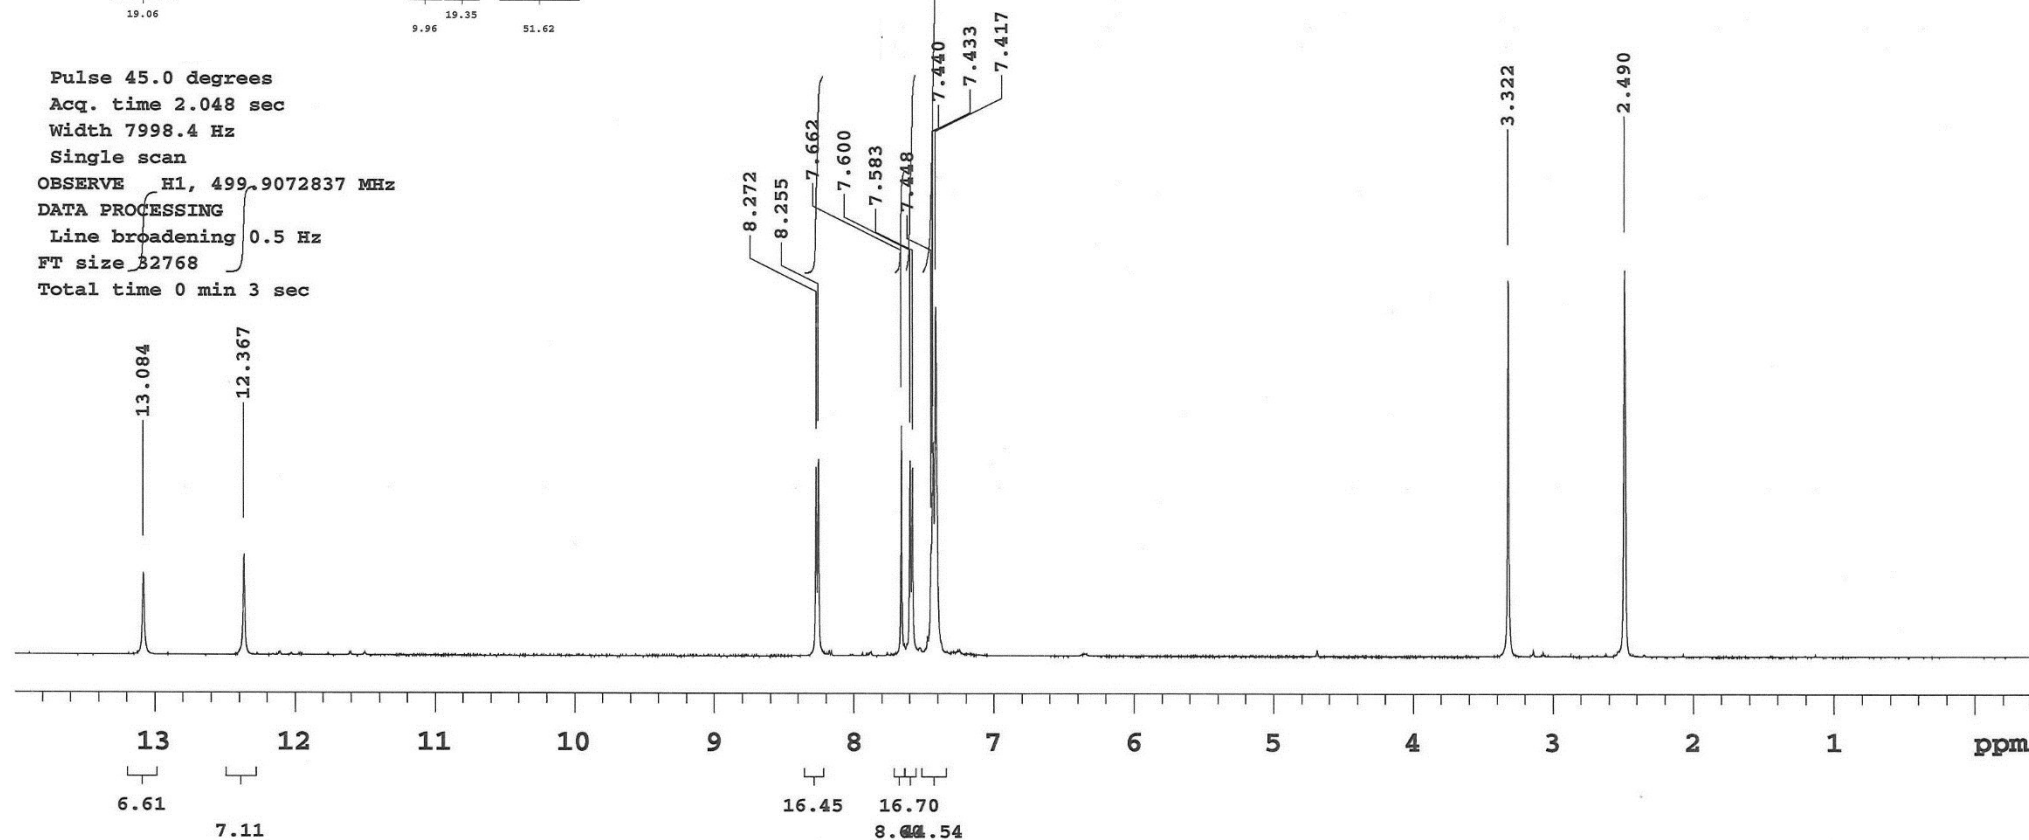

mm160728\_H\_4\_C1\_Acetophenone\_PP\_CARBON

Sample Name:

mm160728\_H\_4\_C1\_Acetophenone\_PP

Data Collected on:

ernst.sci.uow.edu.au-inova500

Archive directory:

Sample directory:

FidFile: CARBON

Pulse Sequence: CARBON (s2pul)

Solvent: dmso

Data collected on: Jul 28 2016

Temp. 22.5 C / 295.6 K

Operator: uowvnmrs

Relax. delay 1.000 sec

Pulse 45.0 degrees

Acq. time 1.043 sec

Width 31421.8 Hz

192 repetitions

OBSERVE C13, 125.7018460 MHz

DECOUPLE H1, 499.9097792 MHz

Power 42 dB

continuously on

WALTZ-16 modulated

DATA PROCESSING

Line broadening 0.5 Hz

FT size 65536

Total time 59 min

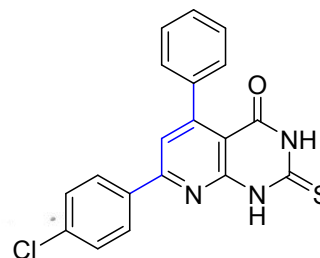

10a

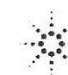

Agilent Technologies

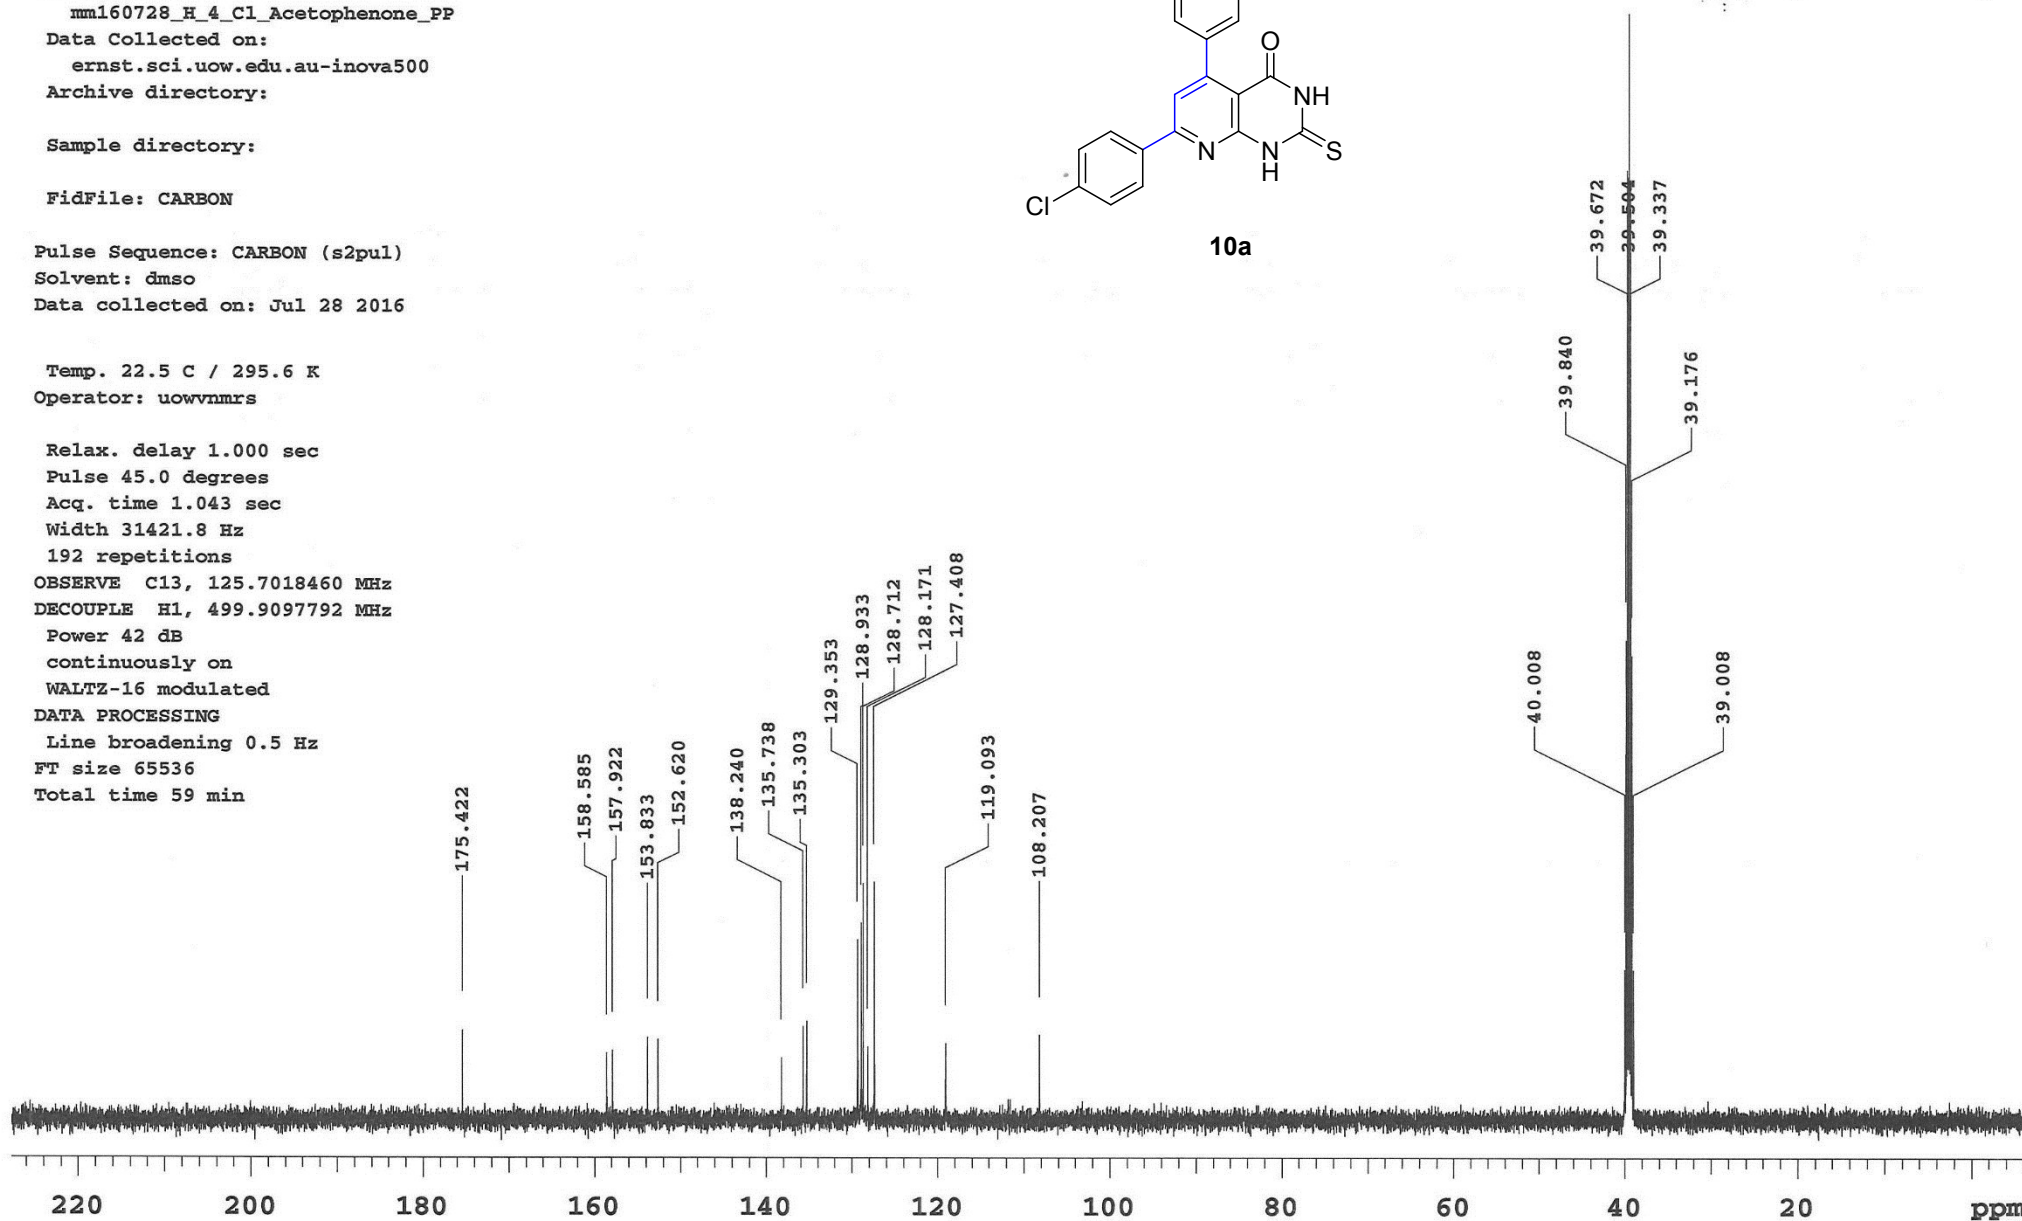

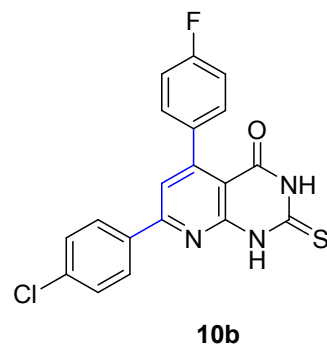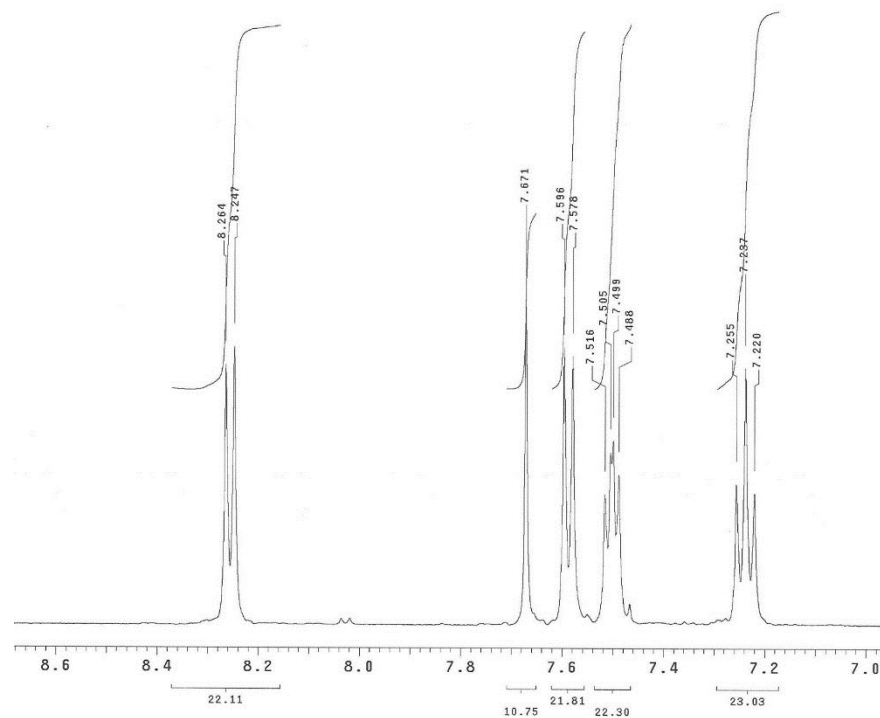

File: Proton

Pulse Sequence: s2pu1

Solvent: dms0

Temp. 25.0 C / 298.1 K

Operator: uowvmrs

VNMRS-500 "pyne06.domain.com"

Relax. delay 0.001 sec

Pulse 45.0 degrees

Acq. time 2.045 sec

Width 8012.8 Hz

Single scan

OBSERVE H1, 499.7437645 MHz

DATA PROCESSING

Line broadening 0.5 Hz

FT size 65536

Total time 0 min, 2 sec

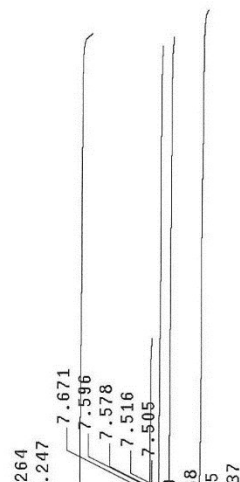

.490

mm160726\_P\_F\_Benzaldehyde\_P\_Cl\_Acetophenone\_CARBON

Sample Name:

mm160726\_P\_F\_Benzaldehyde\_P\_Cl\_Acetophenone

Data Collected on:

ernst.sci.uow.edu.au-inova500

Archive directory:

Sample directory:

FidFile: CARBON

Pulse Sequence: CARBON (s2pul)

Solvent: dmso

Data collected on: Jul 26 2016

Temp. 23.3 C / 296.4 K

Operator: uowvnmrs

Relax. delay 1.000 sec

Pulse 45.0 degrees

Acq. time 1.043 sec

Width 31421.8 Hz

2816 repetitions

OBSERVE C13, 125.7018460 MHz

DECOUPLE H1, 499.9097792 MHz

Power 42 dB

continuously on

WALTZ-16 modulated

DATA PROCESSING

Line broadening 0.5 Hz

FT size 65536

Total time 1 hr, 59 min

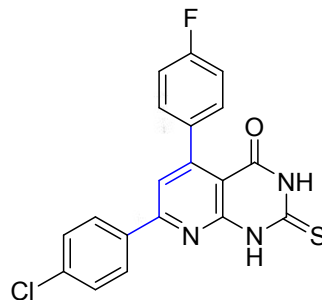

10b

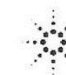

Agilent Technologies

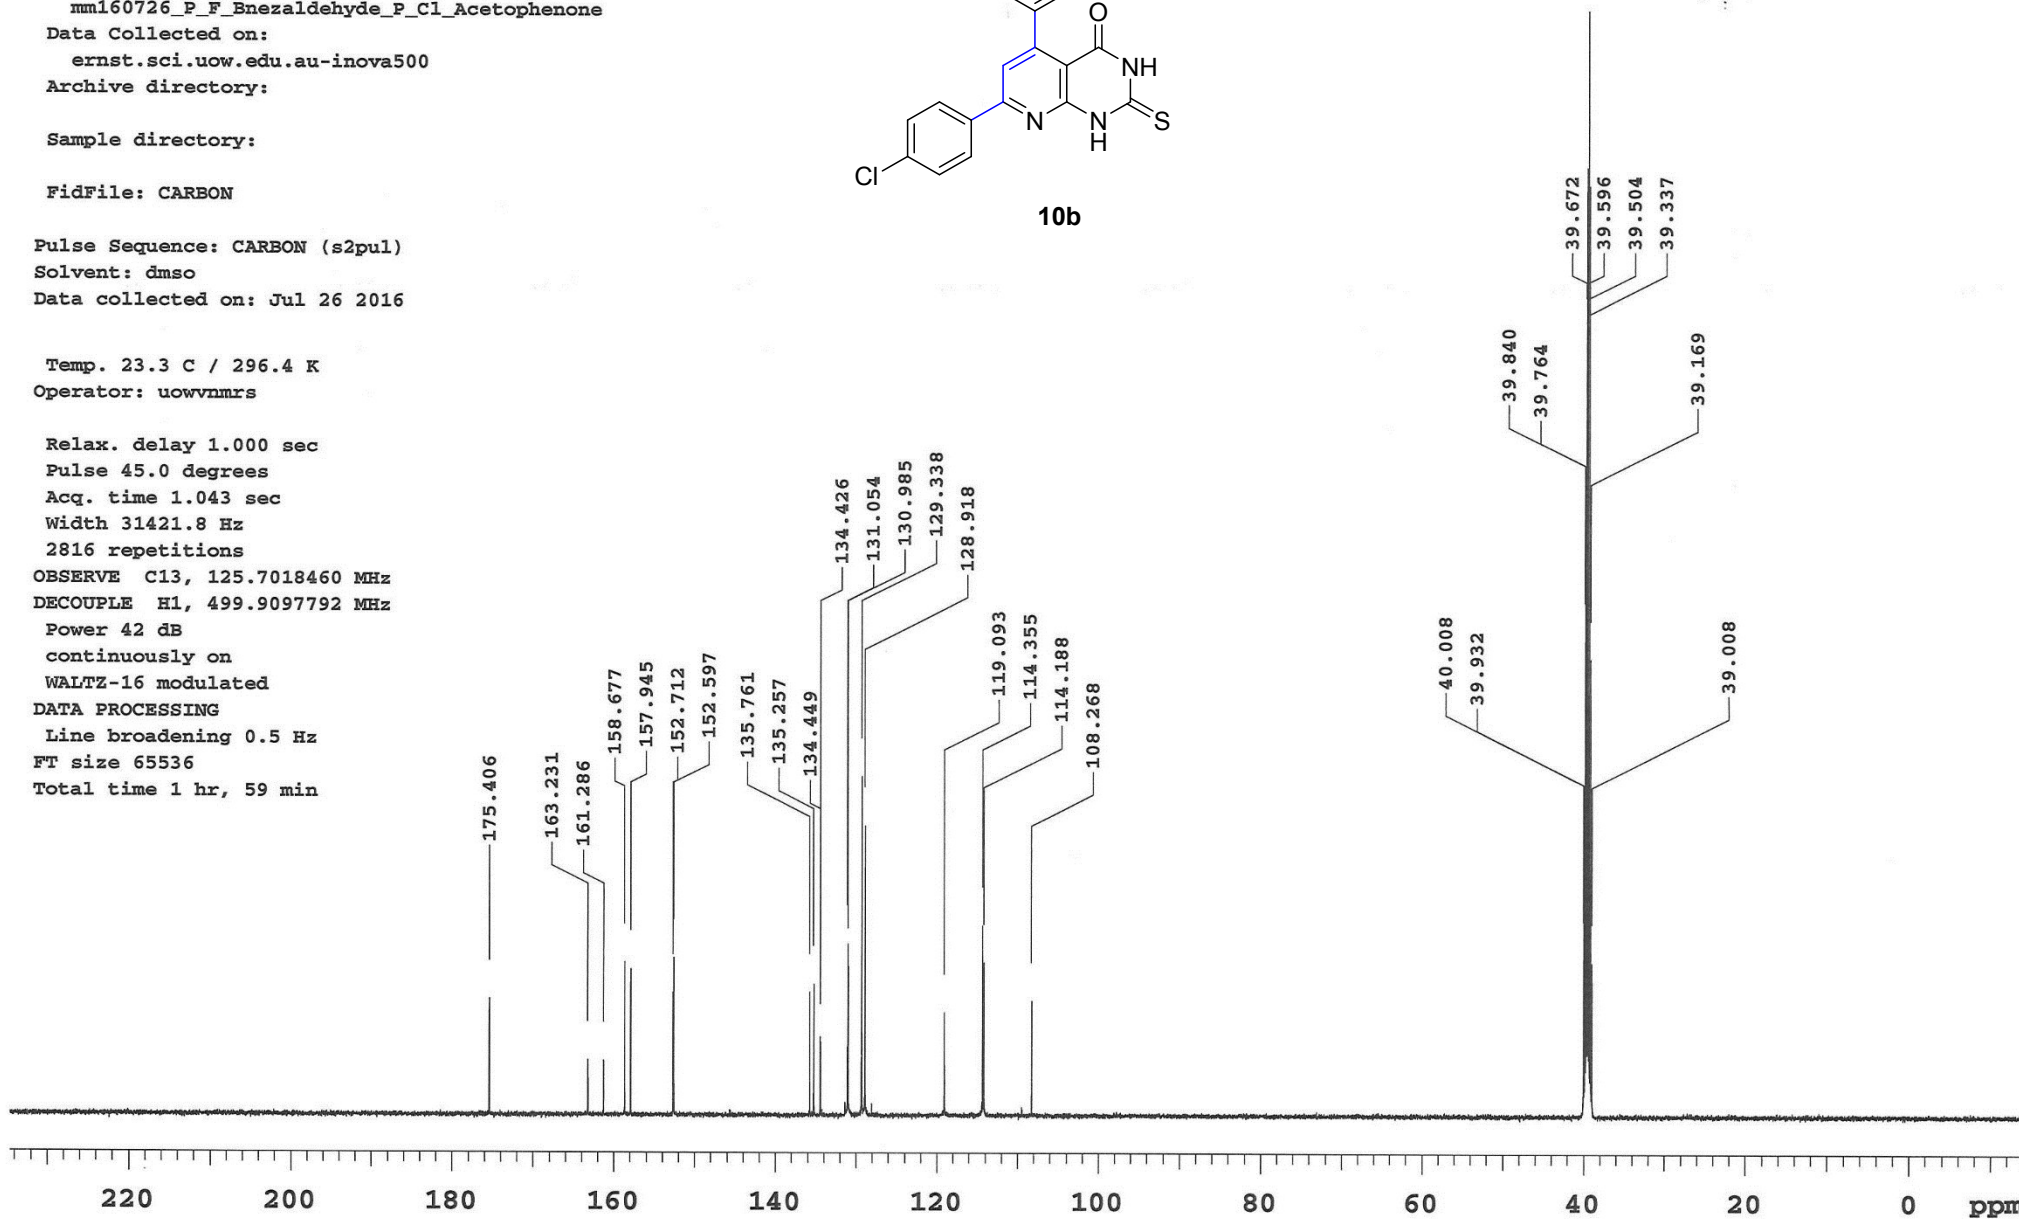

mm160726\_4\_CL\_Benzald\_4\_Cl\_Acetophenone\_PROTON

Sample Name:

Data Collected on:

ernst.sci.uow.edu.au-inova500

Archive directory:

Sample directory:

FidFile: PROTON

Pulse Sequence: PROTON (s2pul)

Solvent: dmso

Data collected on: Jul 26 2016

Operator: uowvnmrs

Relax. delay 1.000 sec

Pulse 45.0 degrees

Acq. time 2.048 sec

Width 7998.4 Hz

Single scan

OBSERVE H1, 499.9072847 MHz

DATA PROCESSING

Line broadening 0.5 Hz

FT size 32768

Total time 0 min 3 sec

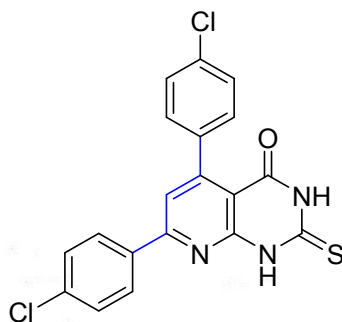

10c

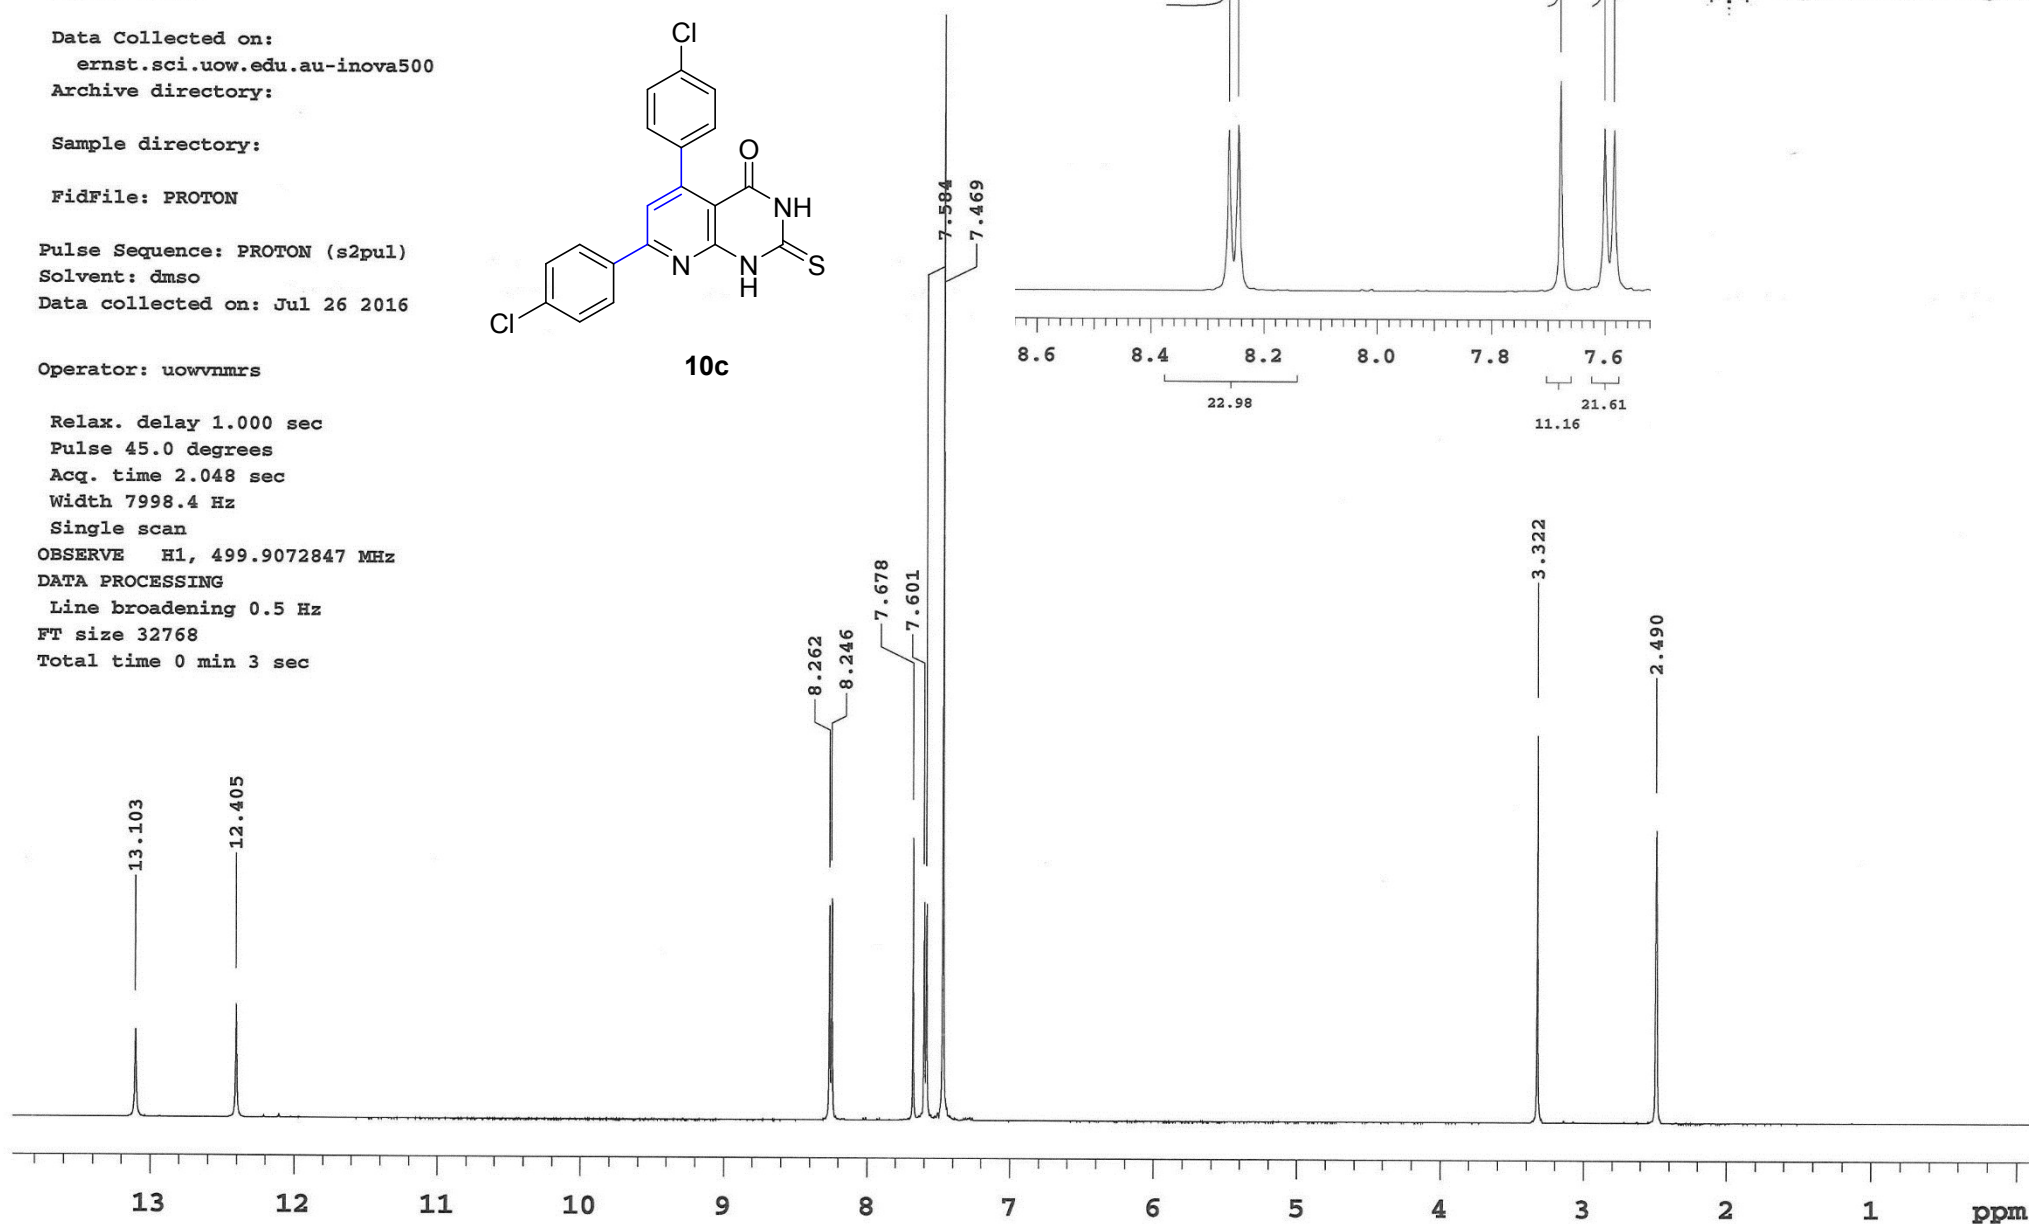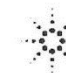

Agilent Technologies



mm160726\_4\_C1\_Benzald\_4\_C1\_Acetophenone\_Carbon

File: Carbon

Pulse Sequence: s2pu1

Solvent: dmsd

Temp. 25.0 C / 298.1 K

Operator: uowvnmrs

VNMRS-500 "pyne06.domain.com"

Relax. delay 0.500 sec

Pulse 45.0 degrees

Acq. time 1.500 sec

Width 30487.8 Hz

1280 repetitions

OBSERVE C13, 125.6607298 MHz

DECOUPLE H1, 499.7462675 MHz

Power 45 dB

continuously on

WALTZ-16 modulated

DATA PROCESSING

Line broadening 1.0 Hz

FT size 65536

Total time 59 min, 59 sec

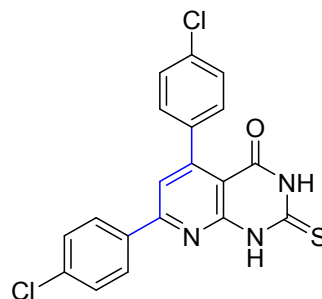

10c

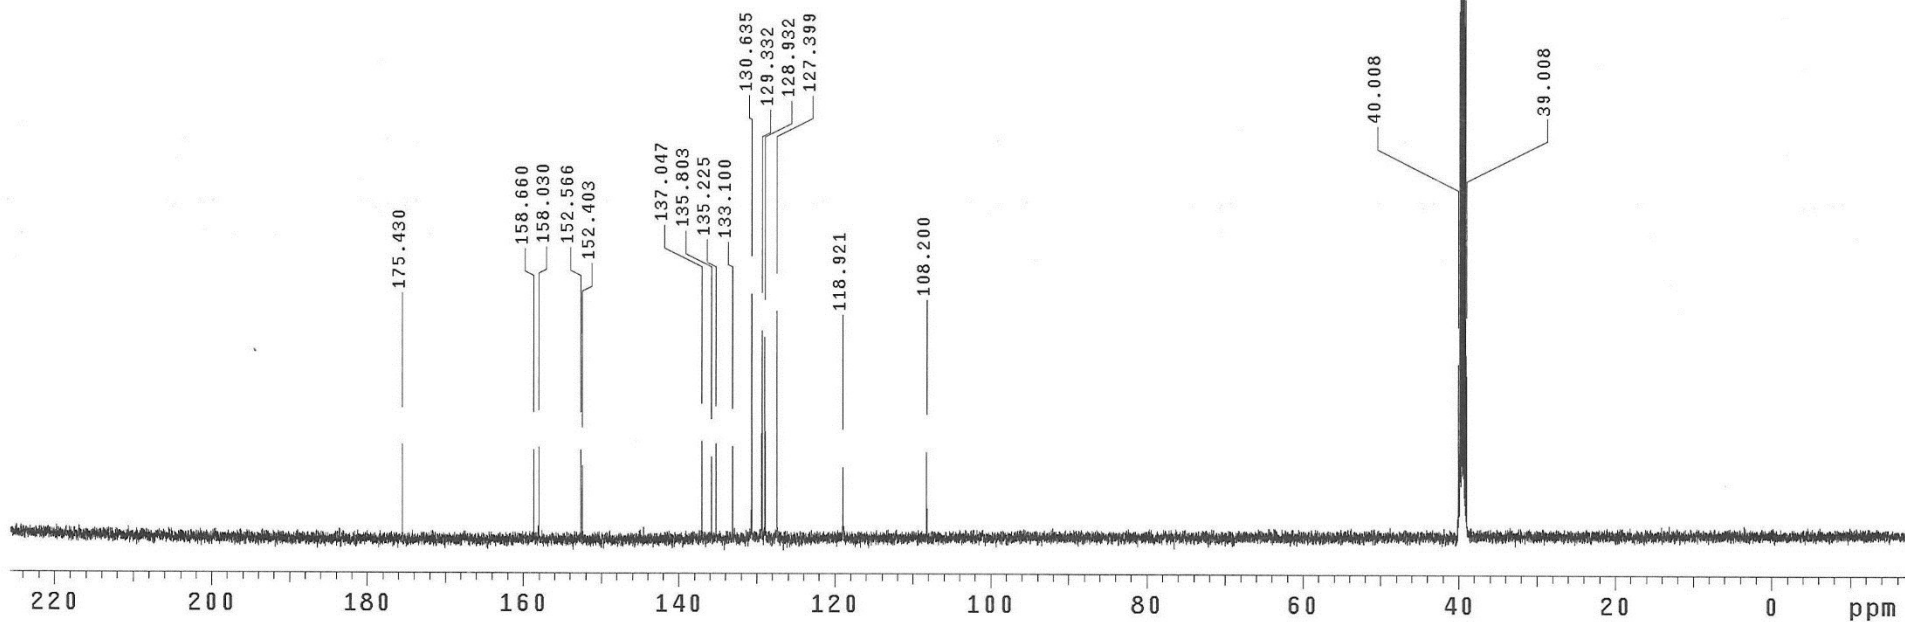



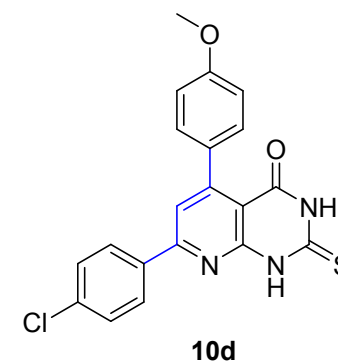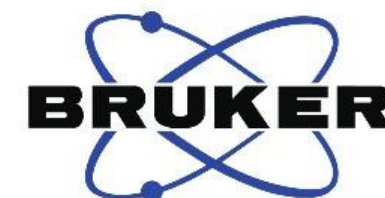

Current Data Parameters  
 NAME soha-5  
 EXPNO 1  
 PROCNO 1

F2 - Acquisition Parameters  
 Date\_ 20170207  
 Time 10.09  
 INSTRUM spect  
 PROBHD 5 mm PABBO BB/  
 PULPROG zg30  
 TD 65536  
 SOLVENT DMSO  
 NS 64  
 DS 2  
 SWH 8012.820 Hz  
 FIDRES 0.122266 Hz  
 AQ 4.0894465 sec  
 RG 205.37  
 DW 62.400 usec  
 DE 6.50 usec  
 TE 298.0 K  
 D1 1.00000000 sec  
 TD0 1

===== CHANNEL f1 =====  
 SFO1 400.1524711 MHz  
 NUC1 1H  
 P1 12.00 usec  
 PLW1 18.00000000 W

F2 - Processing parameters  
 SI 65536  
 SF 400.1500000 MHz  
 WDW EM  
 SSB 0  
 LB 0.30 Hz  
 GB 0  
 PC 1.00

— 13.015  
 — 12.368

8.222  
 8.202  
 7.587  
 7.559  
 7.538  
 7.408  
 7.385  
 6.961  
 6.943

3.807  
 3.430  
 2.882  
 2.726  
 2.512

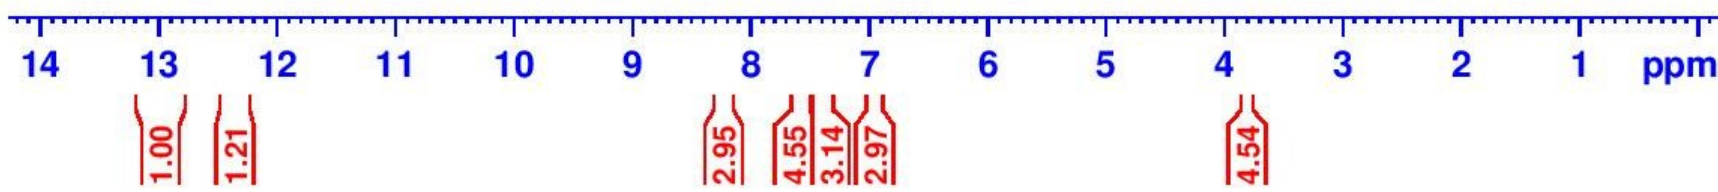

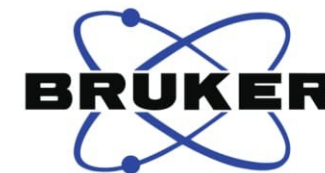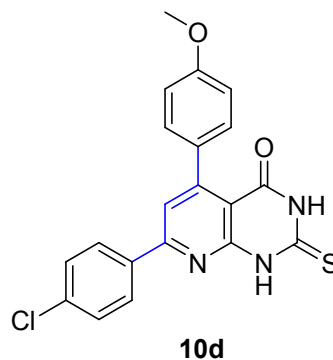

175.81  
160.07  
159.19  
158.25  
154.13  
153.22  
136.14  
135.88  
131.89  
130.97  
130.68  
129.78  
129.38  
128.56  
127.86  
119.59  
114.76  
113.62  
113.36  
108.55  
55.88  
55.68  
40.63  
40.43  
40.22  
40.01  
39.80  
39.59  
39.38

Current Data Parameters  
NAME Jul02-2017-nmr  
EXPNO 20  
PROCNO 1

F2 - Acquisition Parameters  
Date\_ 20170702  
Time 13.42  
INSTRUM spect  
PROBHD 5 mm PABBO BB/  
PULPROG zgpg30  
TD 65536  
SOLVENT DMSO  
NS 1024  
DS 4  
SWH 24038.461 Hz  
FIDRES 0.366798 Hz  
AQ 1.3631488 sec  
RG 194.81  
DW 20.800 usec  
DE 6.50 usec  
TE 300.0 K  
D1 2.00000000 sec  
D11 0.03000000 sec  
TD0 1

===== CHANNEL f1 =====  
SFO1 100.6328883 MHz  
NUC1 13C  
P1 10.00 usec  
PLW1 66.00000000 W

===== CHANNEL f2 =====  
SFO2 400.1716007 MHz  
NUC2 1H  
CPDPRG[2] waltz16  
PCPD2 90.00 usec  
PLW2 16.50000000 W  
PLW12 0.20370001 W  
PLW13 0.16500001 W

F2 - Processing parameters  
SI 32768  
SF 100.6228270 MHz  
WDW EM  
SSB 0  
LB 1.00 Hz  
GB 0  
PC 1.40

200 180 160 140 120 100 80 60 40 20 0 ppm

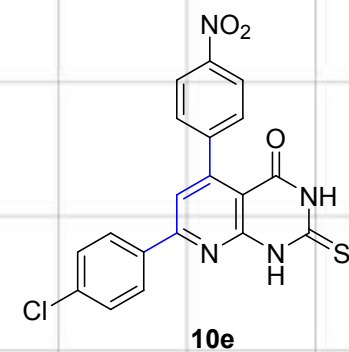

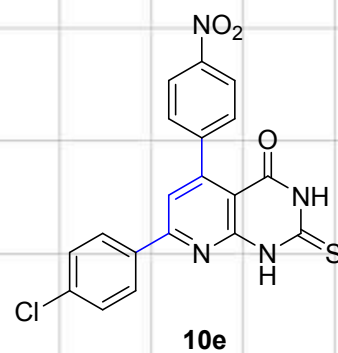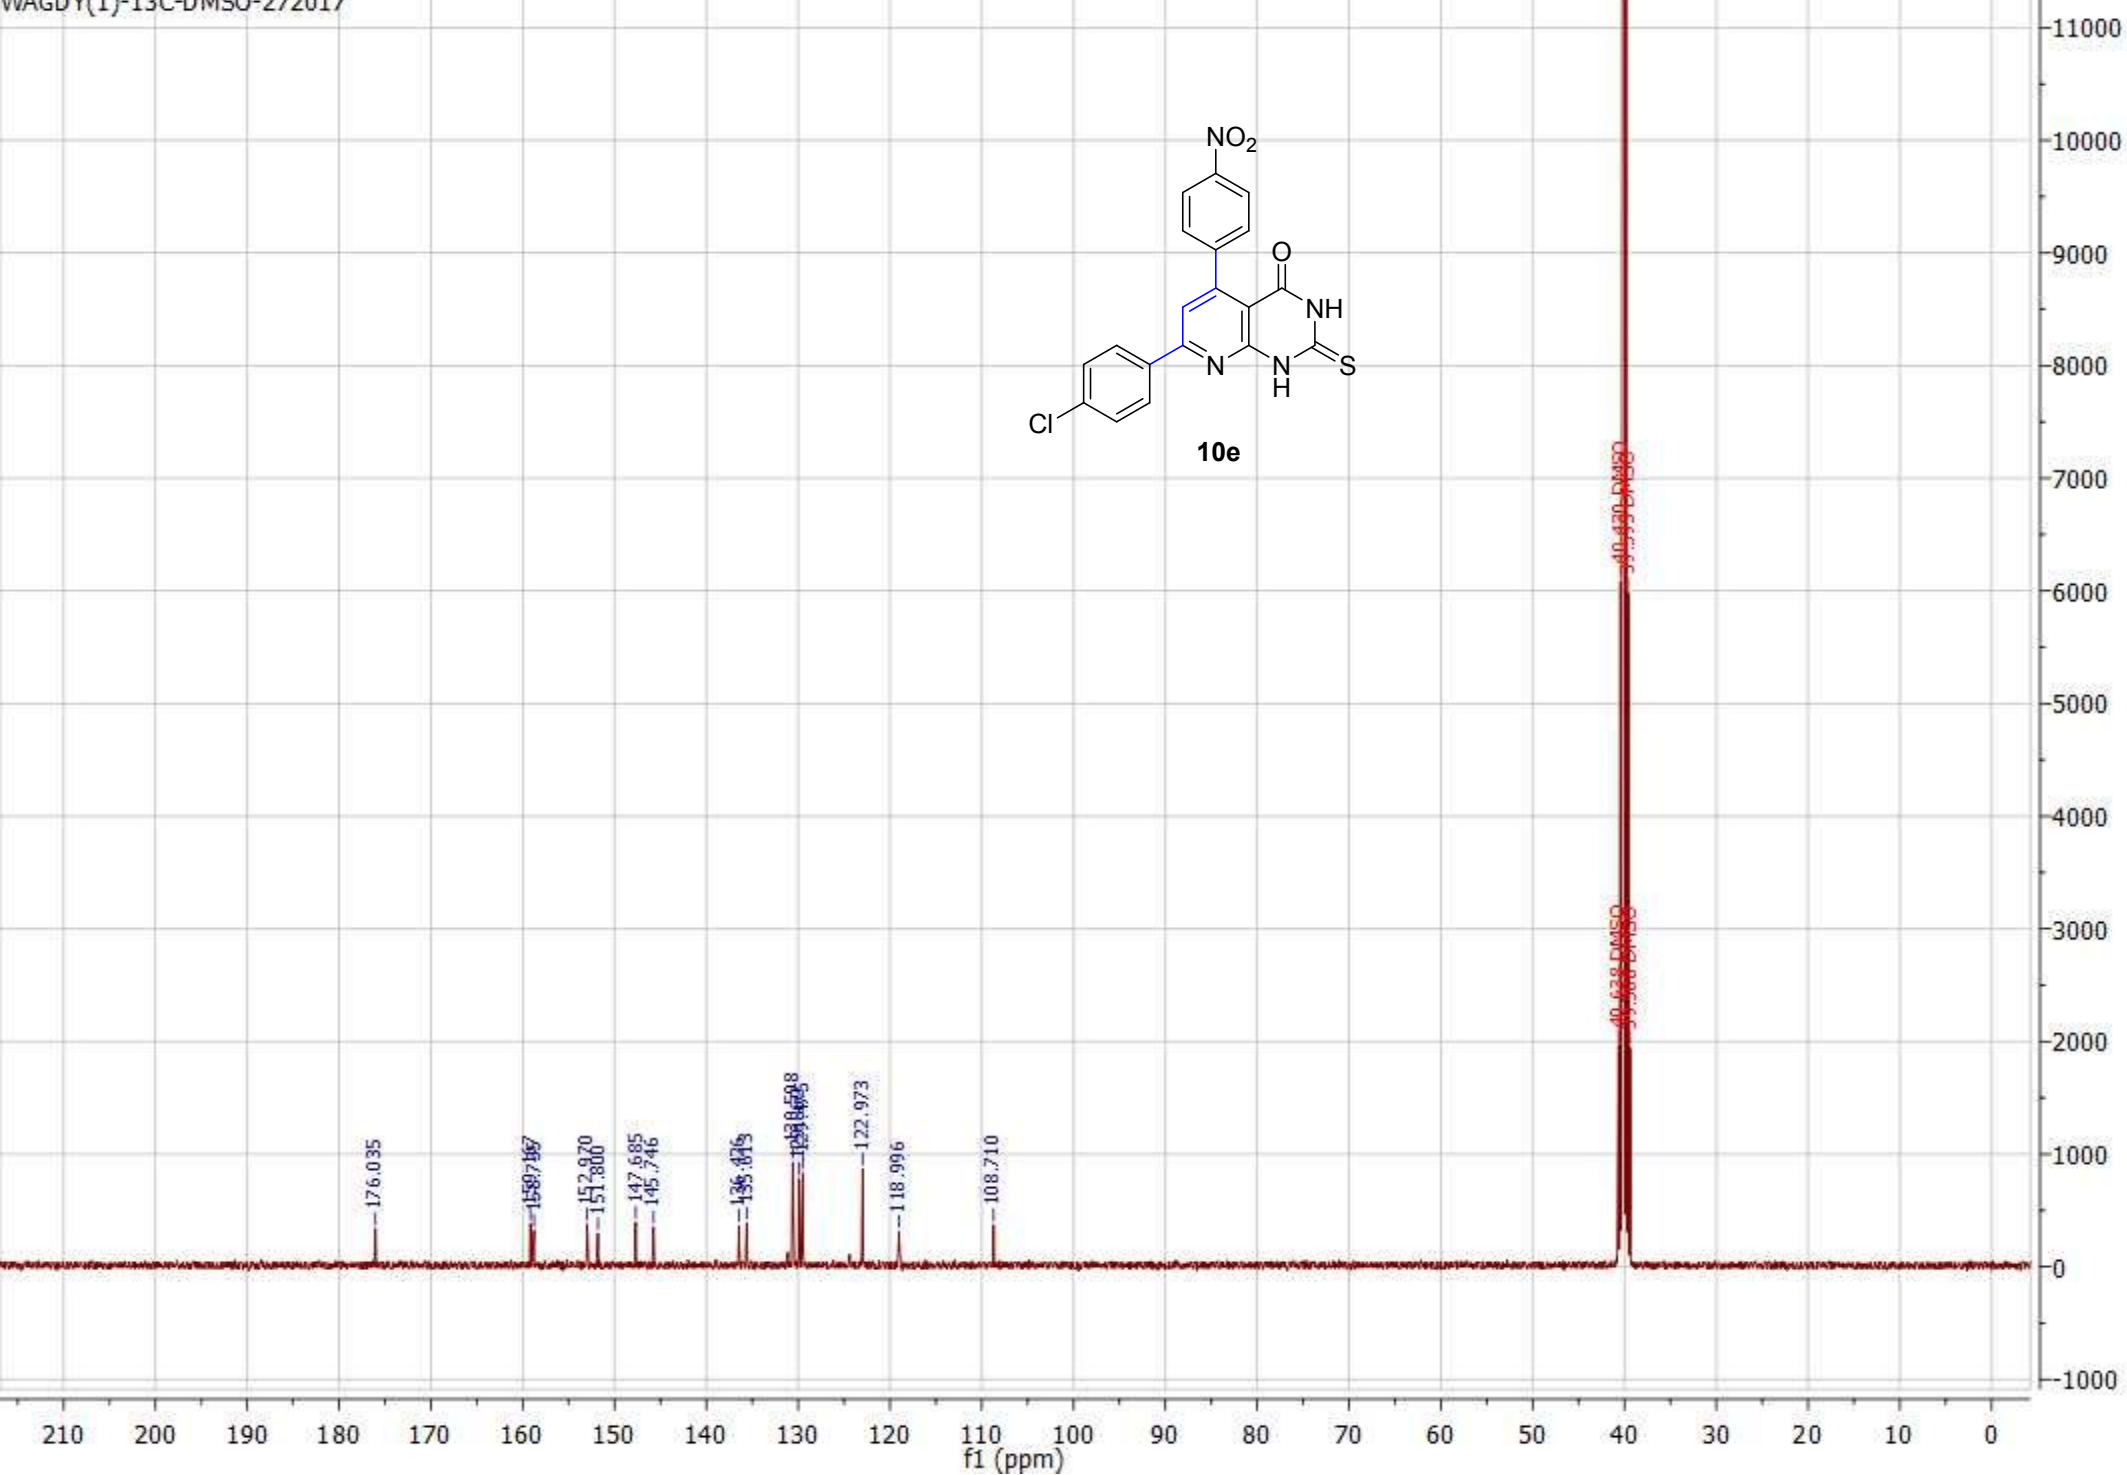

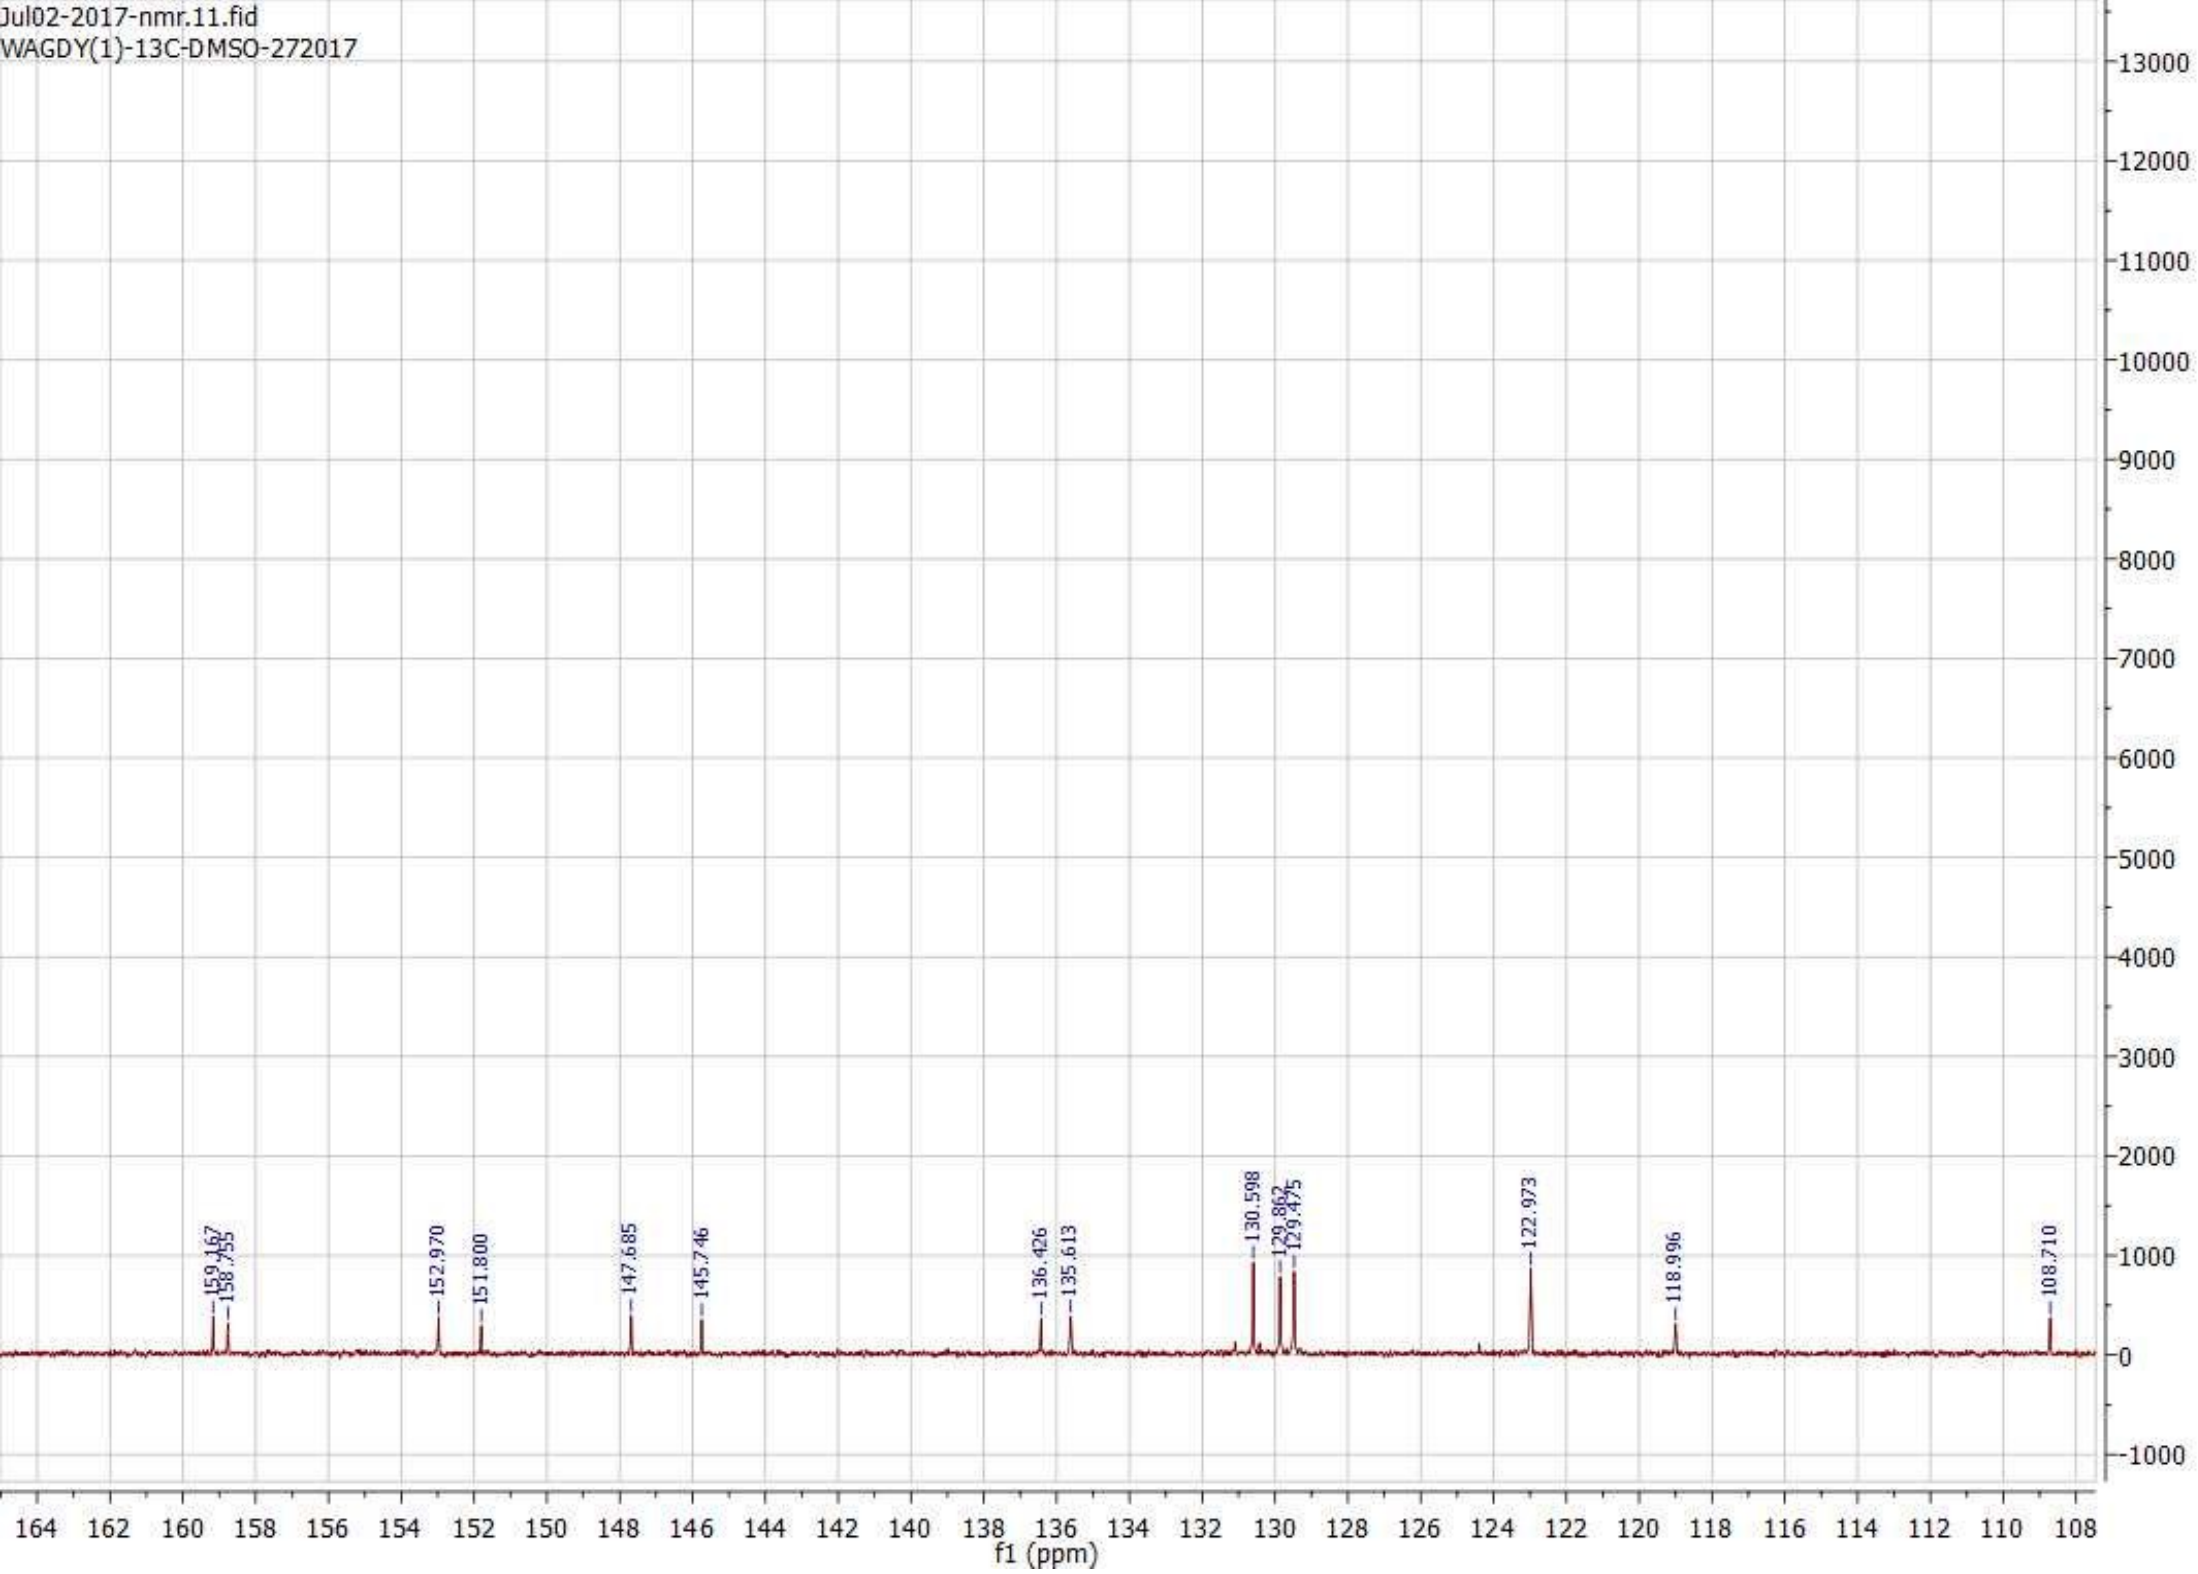

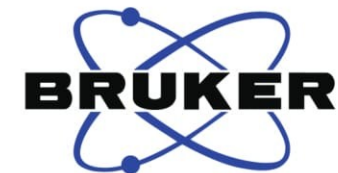

Current Data Parameters  
NAME Jul02-2017-nmr  
EXPNO 6  
PROCNO 1

F2 - Acquisition Parameters  
Date\_ 20170702  
Time 22.44  
INSTRUM spect  
PROBHD 5 mm PABBO BB/  
PULPROG zgpg30  
TD 65536  
SOLVENT DMSO  
NS 1024  
DS 4  
SWH 24038.461 Hz  
FIDRES 0.366798 Hz  
AQ 1.3631488 sec  
RG 194.81  
DW 20.800 usec  
DE 6.50 usec  
TE 300.0 K  
D1 2.00000000 sec  
D11 0.03000000 sec  
TD0 1

===== CHANNEL f1 =====  
SFO1 100.6328883 MHz  
NUC1 13C  
P1 10.00 usec  
PLW1 66.00000000 W

===== CHANNEL f2 =====  
SFO2 400.1716007 MHz  
NUC2 1H  
CPDPRG[2] waltz16  
PCPD2 90.00 usec  
PLW2 16.50000000 W  
PLW12 0.20370001 W  
PLW13 0.16500001 W

F2 - Processing parameters  
SI 32768  
SF 100.6228270 MHz  
WDW EM  
SSB 0  
LB 1.00 Hz  
GB 0  
PC 1.40

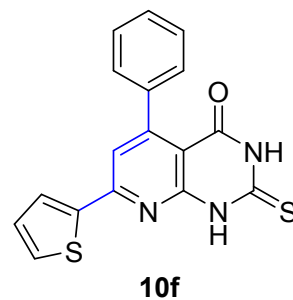

175.86  
158.92  
155.41  
153.97  
153.11  
142.83  
138.78  
129.62  
129.38  
129.03  
128.57  
127.90  
118.08  
107.97

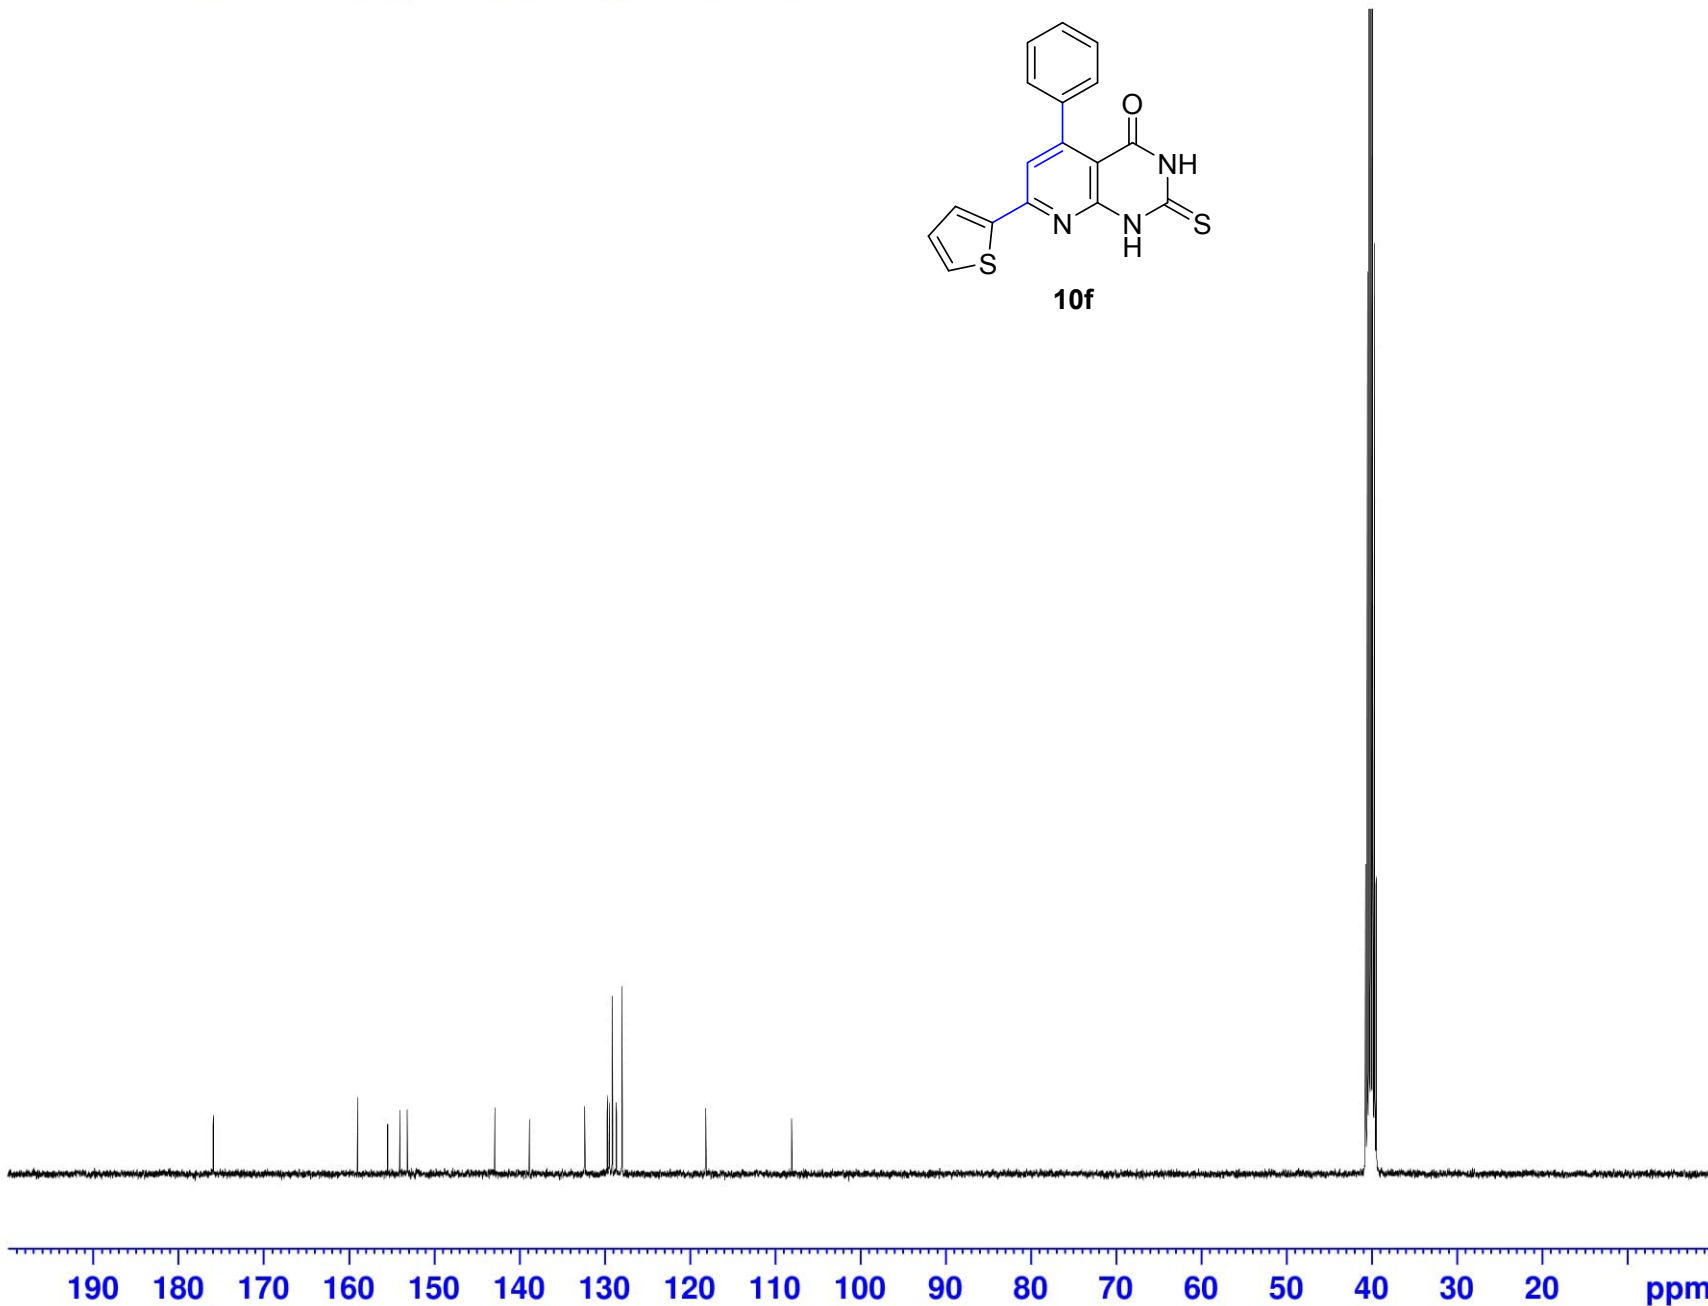



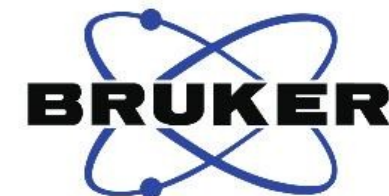

# Current Data Parameters

NAME soha-7  
EXPNO 1  
PROCNO 1

# F2 - Acquisition Parameters

Date\_ 20170207  
Time 10.18  
INSTRUM spect  
PROBHD 5 mm PABBO BB/  
PULPROG zg30  
TD 65536  
SOLVENT DMSO  
NS 64  
DS 2  
SWH 8012.820 Hz  
FIDRES 0.122266 Hz  
AQ 4.0894465 sec  
RG 205.37  
DW 62.400 usec  
DE 6.50 usec  
TE 298.0 K  
D1 1.00000000 sec  
TD0 1

# ===== CHANNEL f1 =====

SFO1 400.1524711 MHz  
NUC1 1H  
P1 12.00 usec  
PLW1 18.00000000 W

# F2 - Processing parameters

SI 65536  
SF 400.1500000 MHz  
WDW EM  
SSB 0  
LB 0.30 Hz  
GB 0  
PC 1.00

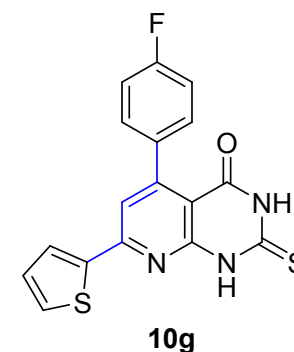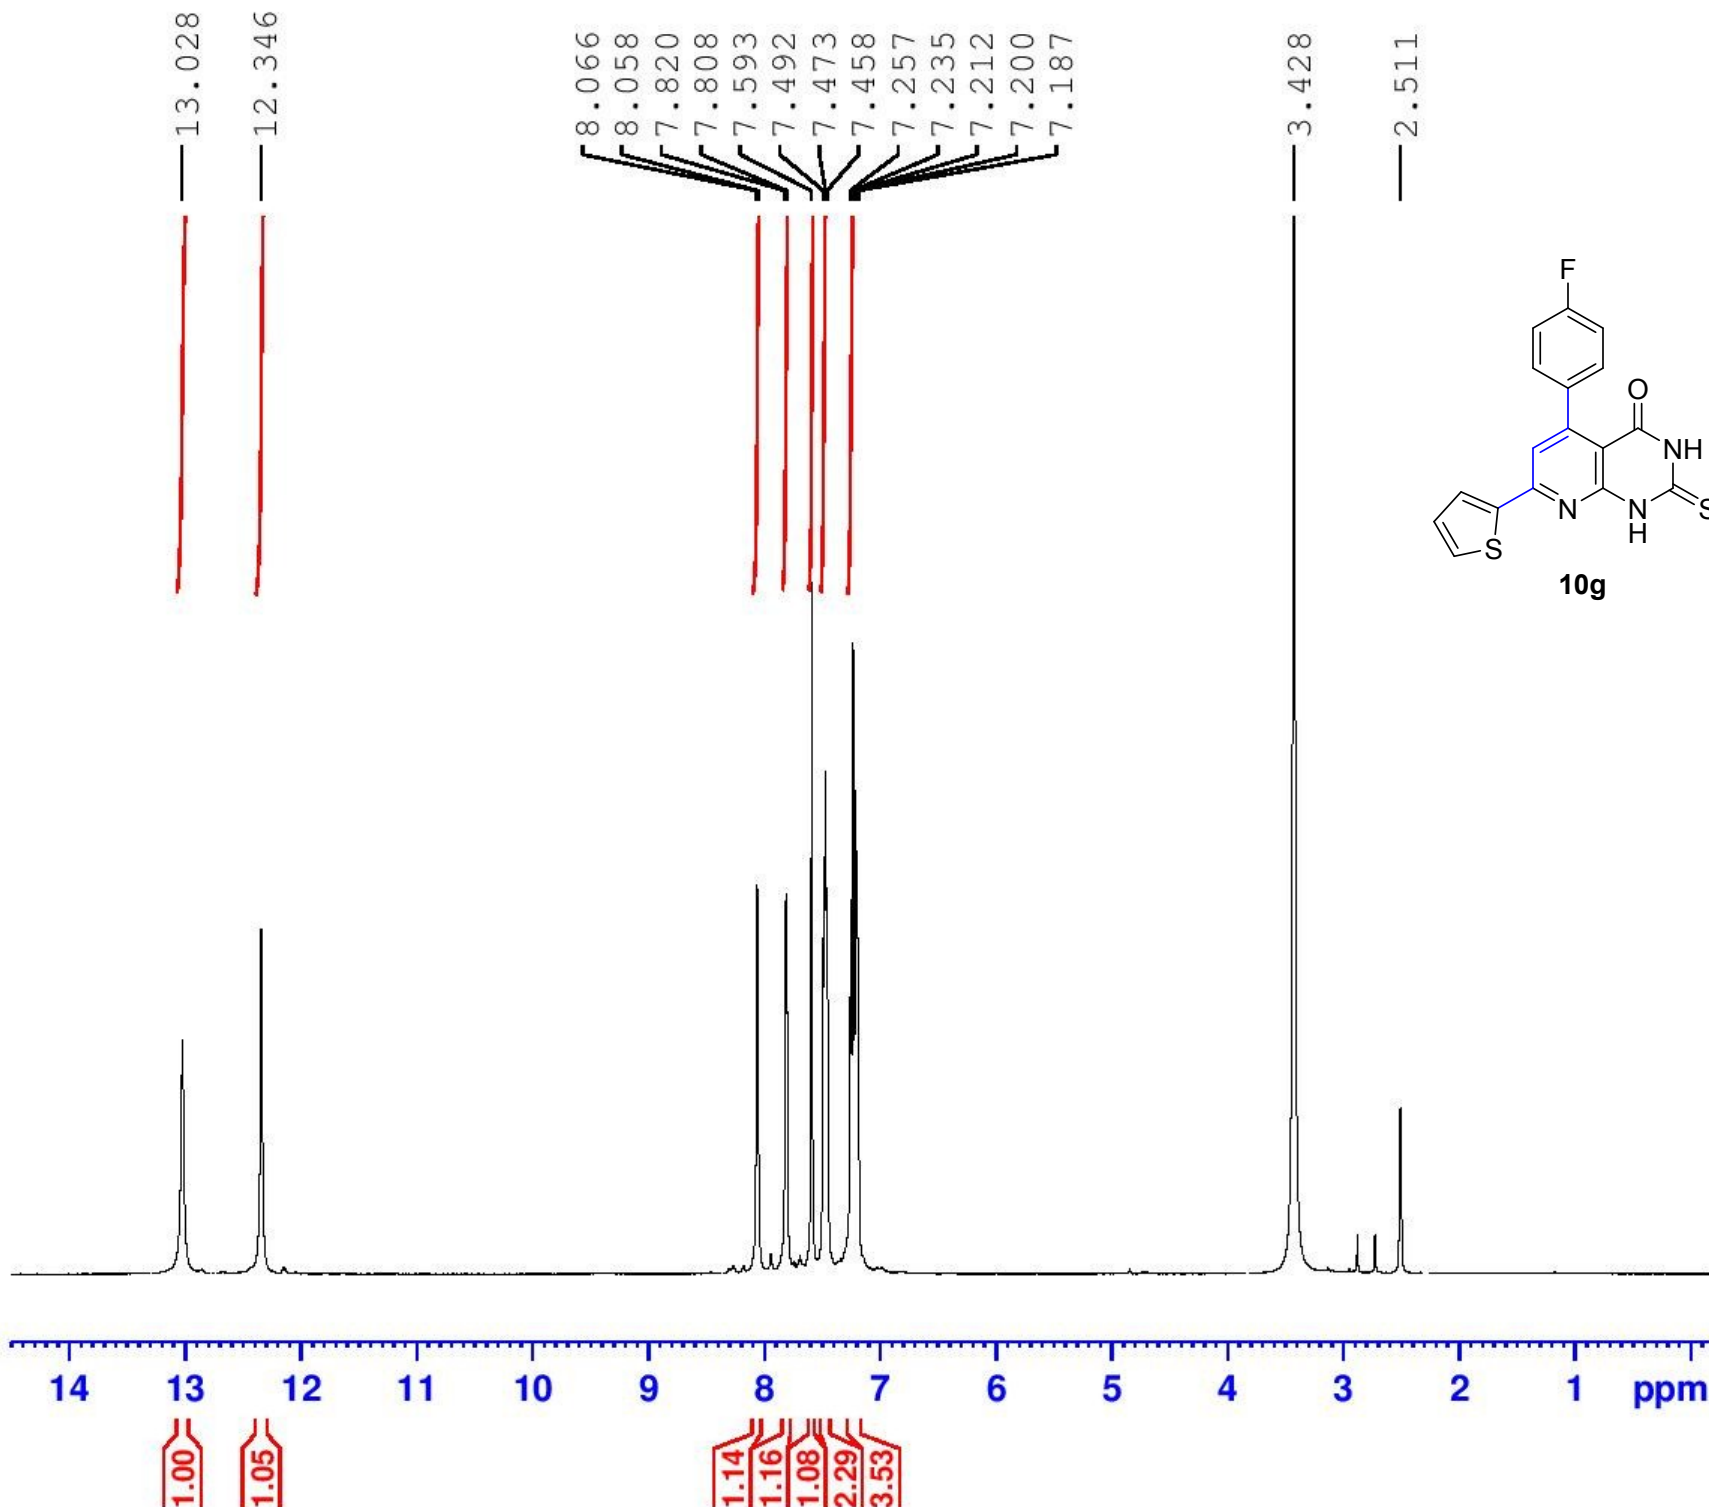

8.066  
8.058

7.820  
7.808

7.593

7.492  
7.473  
7.458

7.257  
7.235  
7.212  
7.200  
7.187

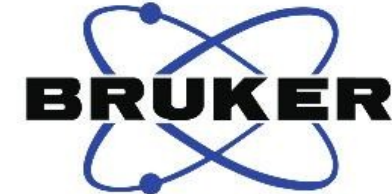

Current Data Parameters  
NAME soha-7  
EXPNO 1  
PROCNO 1

F2 - Acquisition Parameters  
Date\_ 20170207  
Time 10.18  
INSTRUM spect  
PROBHD 5 mm PABBO BB/  
PULPROG zg30  
TD 65536  
SOLVENT DMSO  
NS 64  
DS 2  
SWH 8012.820 Hz  
FIDRES 0.122266 Hz  
AQ 4.0894465 sec  
RG 205.37  
DW 62.400 usec  
DE 6.50 usec  
TE 298.0 K  
D1 1.00000000 sec  
TD0 1

===== CHANNEL f1 =====  
SFO1 400.1524711 MHz  
NUC1 1H  
P1 12.00 usec  
PLW1 18.00000000 W

F2 - Processing parameters  
SI 65536  
SF 400.1500000 MHz  
WDW EM  
SSB 0  
LB 0.30 Hz  
GB 0  
PC 1.00

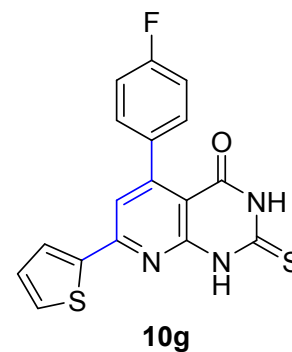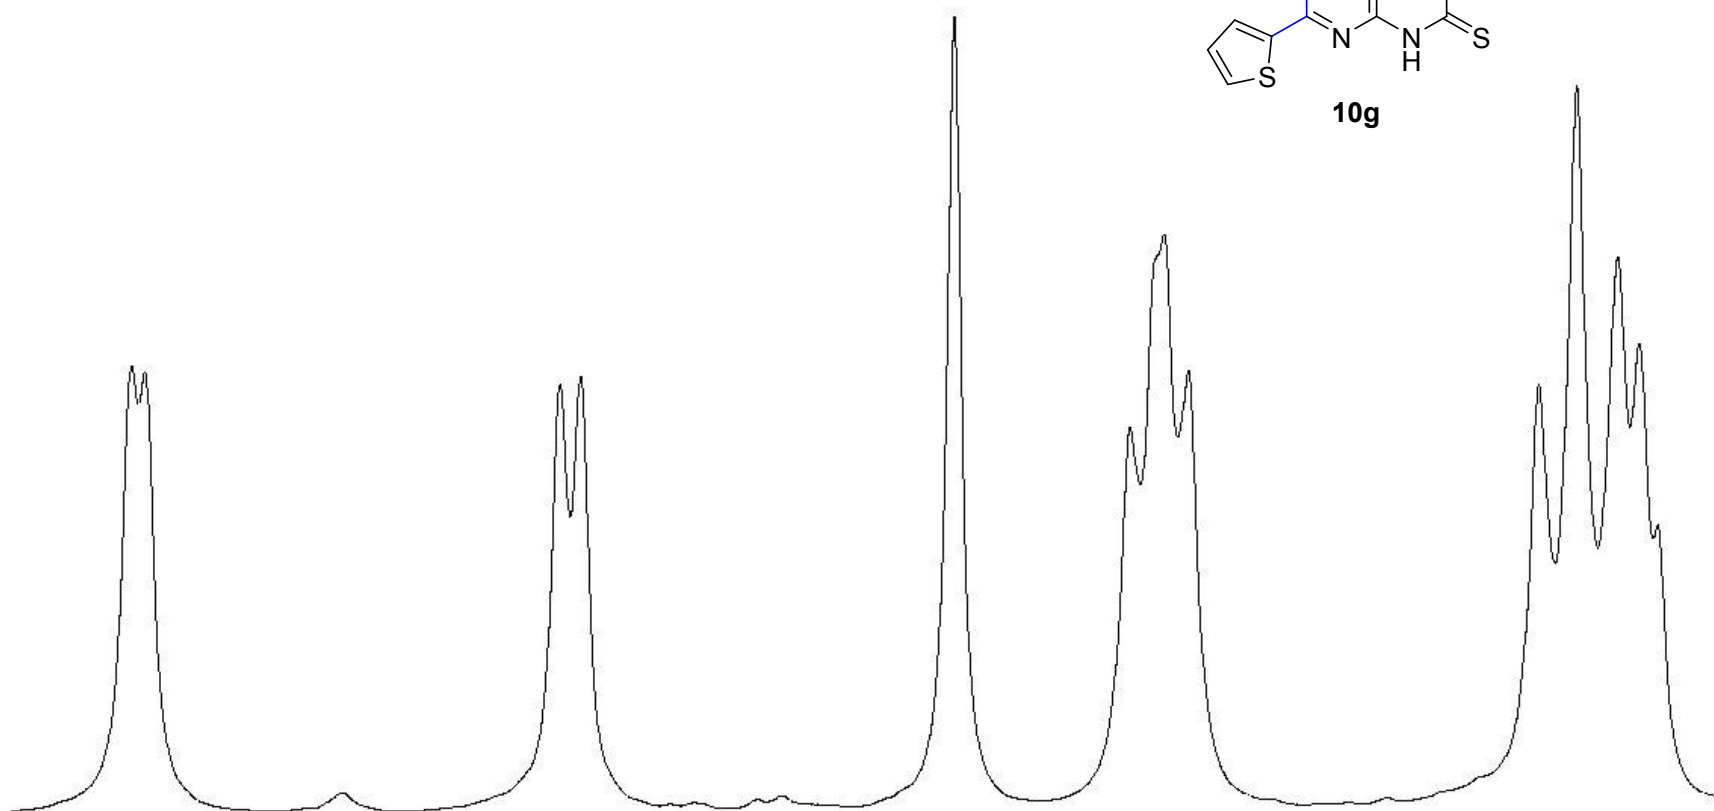

8.1

8.0

7.9

7.8

7.7

7.6

7.5

7.4

7.3

ppm

1.14

1.16

1.08

2.29

3.53



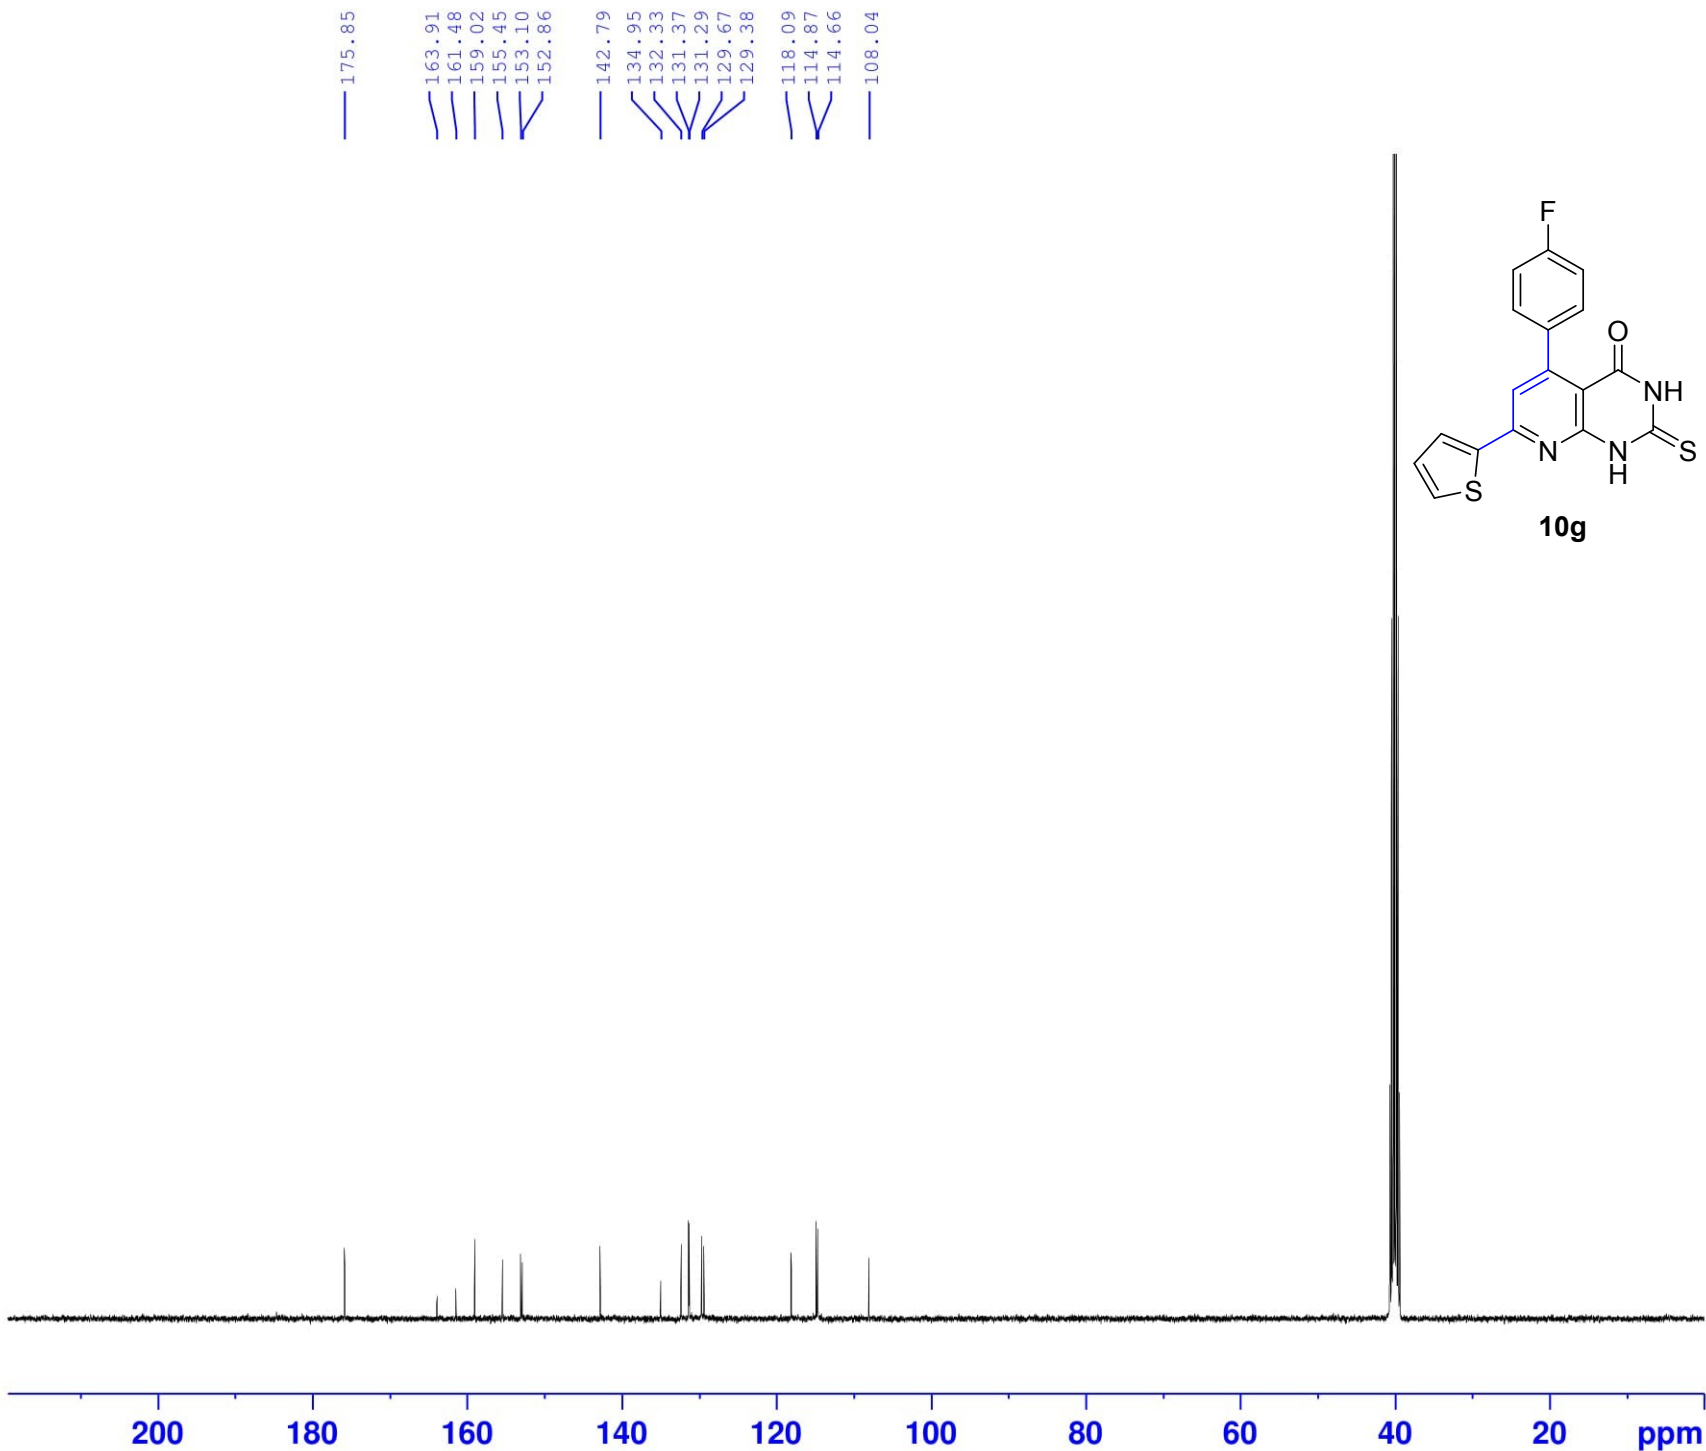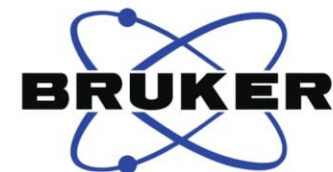

#### Current Data Parameters

NAME Jul02-2017-nmr  
EXPNO 7  
PROCNO 1

#### F2 - Acquisition Parameters

Date\_ 20170702  
Time 23.46  
INSTRUM spect  
PROBHD 5 mm PABBO BB/  
PULPROG zgpg30  
TD 65536  
SOLVENT DMSO  
NS 1024  
DS 4  
SWH 24038.461 Hz  
FIDRES 0.366798 Hz  
AQ 1.3631488 sec  
RG 194.81  
DW 20.800 usec  
DE 6.50 usec  
TE 300.0 K  
D1 2.00000000 sec  
D11 0.03000000 sec  
TD0 1

#### ===== CHANNEL f1 =====

SFO1 100.6328883 MHz  
NUC1 13C  
P1 10.00 usec  
PLW1 66.00000000 W

#### ===== CHANNEL f2 =====

SFO2 400.1716007 MHz  
NUC2 1H  
CPDPRG[2] waltz16  
PCPD2 90.00 usec  
PLW2 16.50000000 W  
PLW12 0.20370001 W  
PLW13 0.16500001 W

#### F2 - Processing parameters

SI 32768  
SF 100.6228270 MHz  
WDW EM  
SSB 0  
LB 1.00 Hz  
GB 0  
PC 1.40

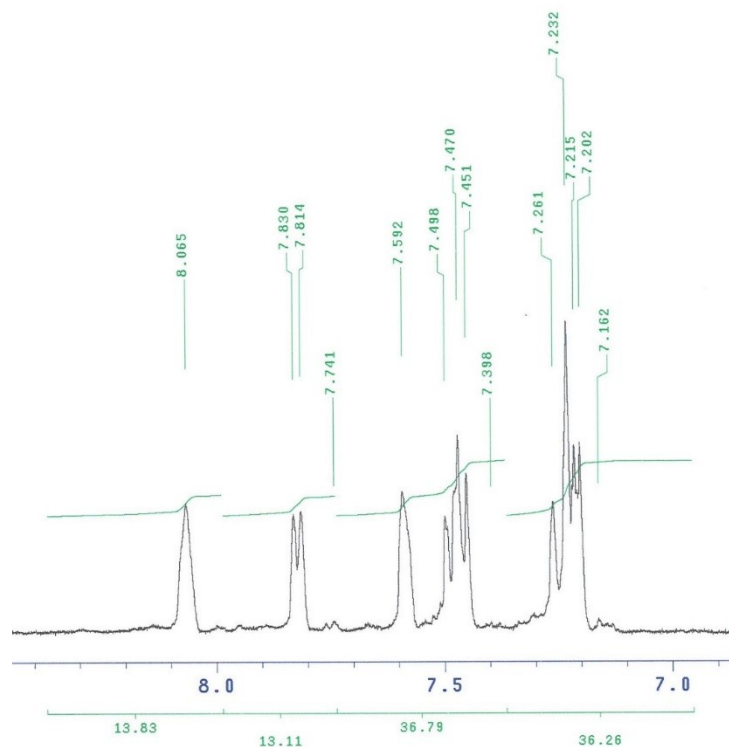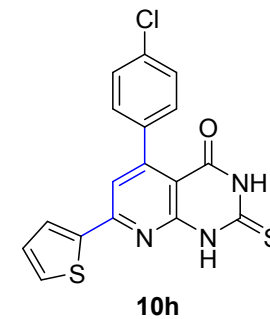

Dr.MohamedFars-8PP-H1-DMSO-Main.Defence.Chemical.Laboratory

Pulse Sequence: s2pu1

Solvent: DMSO  
Temp. 25.0 C / 298.1 K  
GEMINI-300BB "NMR"

Relax. delay 1.000 sec  
Pulse 45.0 degrees  
Acq. time 3.127 sec  
Width 6000.2 Hz  
20 repetitions  
OBSERVE H1, 300.0117460 MHz  
DATA PROCESSING  
FT size 65536  
Total time 5 min, 5 sec

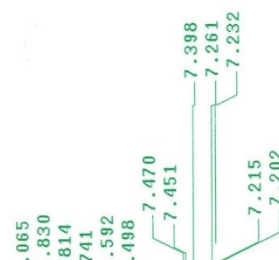

7.065  
7.830  
7.814  
7.741  
7.592  
7.498

7.470  
7.451  
7.398  
7.261  
7.232  
7.215  
7.202

2.506  
2.494

175.87  
162.10  
159.02  
155.53  
153.08  
152.55  
142.75  
137.58  
133.51  
132.38  
130.97  
129.70  
129.38  
127.90  
117.94  
107.95

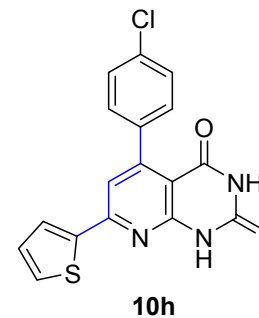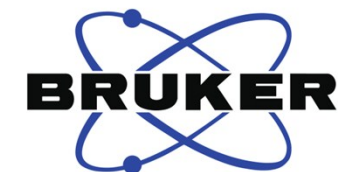

Current Data Parameters  
NAME Jul02-2017-nmr  
EXPNO 8  
PROCNO 1

F2 - Acquisition Parameters  
Date\_ 20170703  
Time 0.49  
INSTRUM spect  
PROBHD 5 mm PABBO BB/  
PULPROG zgpg30  
TD 65536  
SOLVENT DMSO  
NS 1024  
DS 4  
SWH 24038.461 Hz  
FIDRES 0.366798 Hz  
AQ 1.3631488 sec  
RG 194.81  
DW 20.800 usec  
DE 6.50 usec  
TE 300.0 K  
D1 2.00000000 sec  
D11 0.03000000 sec  
TD0 1

===== CHANNEL f1 =====  
SFO1 100.6328883 MHz  
NUC1 13C  
P1 10.00 usec  
PLW1 66.00000000 W

===== CHANNEL f2 =====  
SFO2 400.1716007 MHz  
NUC2 1H  
CPDPRG[2] waltz16  
PCPD2 90.00 usec  
PLW2 16.50000000 W  
PLW12 0.20370001 W  
PLW13 0.16500001 W

F2 - Processing parameters  
SI 32768  
SF 100.6228270 MHz  
WDW EM  
SSB 0  
LB 1.00 Hz  
GB 0  
PC 1.40

200 180 160 140 120 100 80 60 40 20 0 ppm

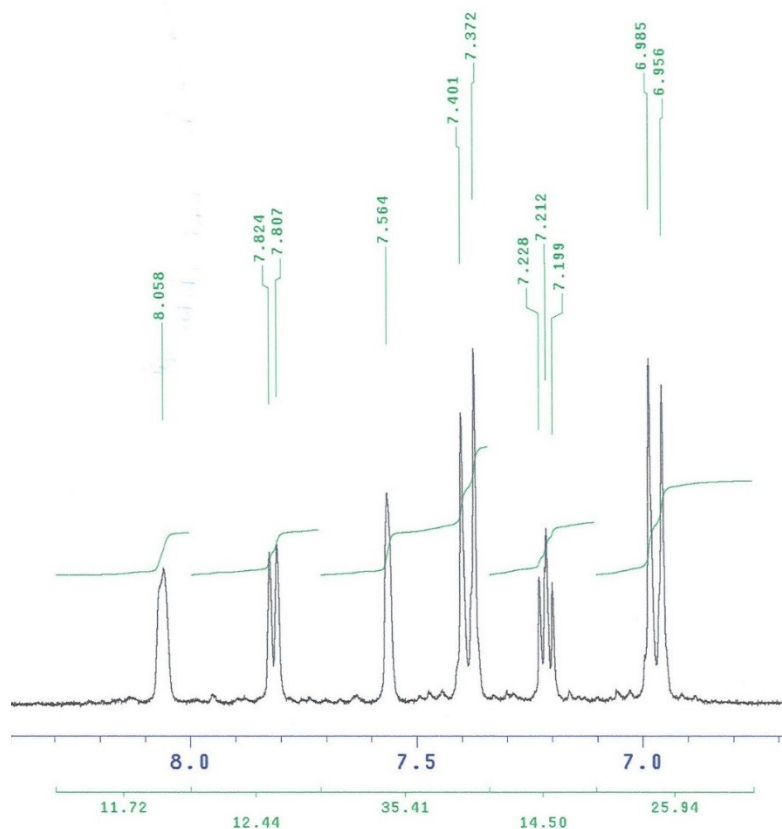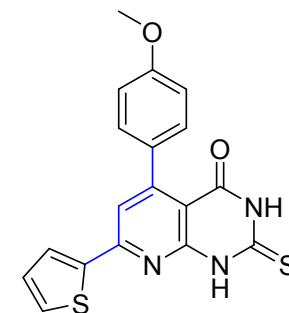

10i

Dr.MohamedFars-9PP-H1-DMSO-Main.Defence.Chemical.Laboratory

Pulse Sequence: s2pu1

Solvent: DMSO

Temp. 25.0 C / 298.1 K

File: Dr.MohamedFars-9PP-H1-DMSO-Main.Defence.Chemical.Laboratory  
GEMINI-300BB "NMR"

Relax. delay 1.000 sec

Pulse 45.0 degrees

Acq. time 3.127 sec

Width 6000.2 Hz

20 repetitions

OBSERVE H1, 300.0117460 MHz

DATA PROCESSING

FT size 65536

Total time 5 min, 5 sec

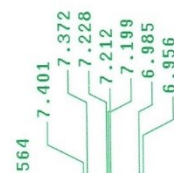

3.822

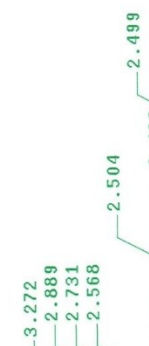

175.76  
160.01  
159.04  
155.24  
153.80  
153.22  
142.89  
132.14  
130.79  
130.72  
129.46  
129.35  
118.11  
113.37  
107.89

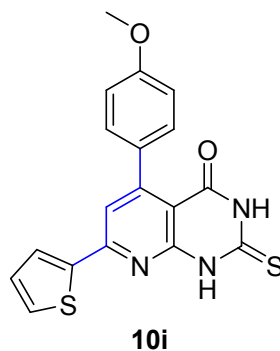

55.68  
40.63  
40.43  
40.22  
40.01  
39.80  
39.59  
39.38

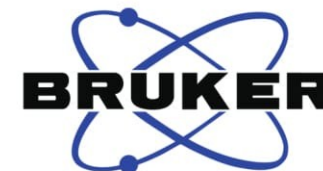

Current Data Parameters  
NAME Jul02-2017-nmr  
EXPNO 9  
PROCNO 1

F2 - Acquisition Parameters  
Date\_ 20170703  
Time 1.51  
INSTRUM spect  
PROBHD 5 mm PABBO BB/  
PULPROG zgpg30  
TD 65536  
SOLVENT DMSO  
NS 1024  
DS 4  
SWH 24038.461 Hz  
FIDRES 0.366798 Hz  
AQ 1.3631488 sec  
RG 194.81  
DW 20.800 usec  
DE 6.50 usec  
TE 300.0 K  
D1 2.00000000 sec  
D11 0.03000000 sec  
TD0 1

===== CHANNEL f1 =====  
SF01 100.6328883 MHz  
NUC1 13C  
P1 10.00 usec  
PLW1 66.00000000 W

===== CHANNEL f2 =====  
SF02 400.1716007 MHz  
NUC2 1H  
CPDPRG[2] waltz16  
PCPD2 90.00 usec  
PLW2 16.50000000 W  
PLW12 0.20370001 W  
PLW13 0.16500001 W

F2 - Processing parameters  
SI 32768  
SF 100.6228270 MHz  
WDW EM  
SSB 0  
LB 1.00 Hz  
GB 0  
PC 1.40

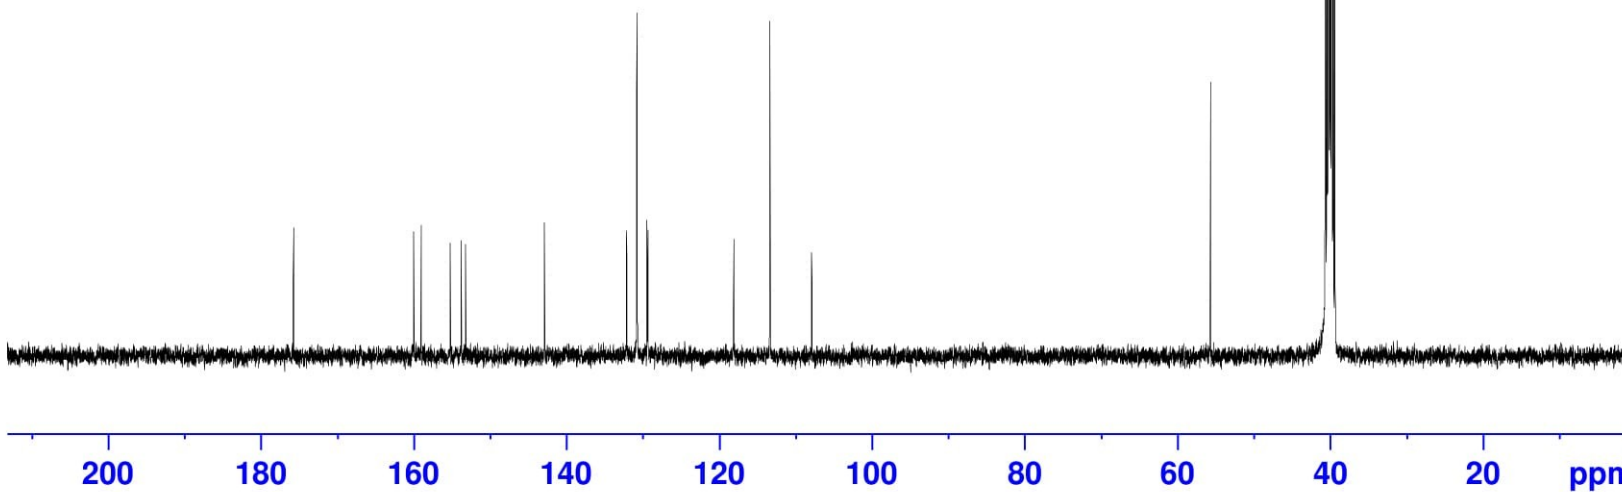

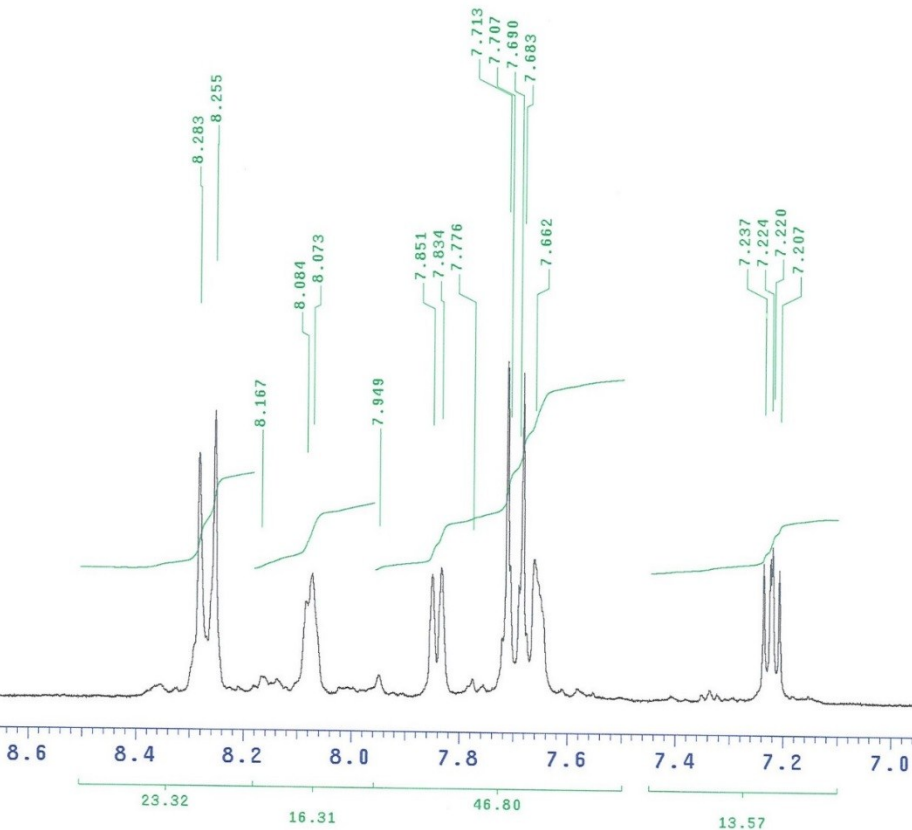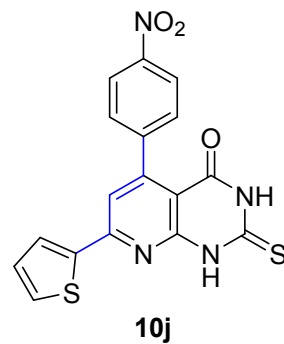

Dr.MohamedFars-10PP-H1-DMSO-Main.Defence.Chemical.Laboratory

Pulse Sequence: s2pu1

Solvent: DMSO  
Temp. 25.0 C / 298.1 K  
GEMINI-300BB "NMR"

Relax. delay 1.000 sec  
Pulse 45.0 degrees  
Acq. time 3.127 sec  
Width 6000.2 Hz  
24 repetitions  
OBSERVE H1, 300.0117460 MHz  
DATA PROCESSING  
FT size 65536  
Total time 5 min, 5 sec

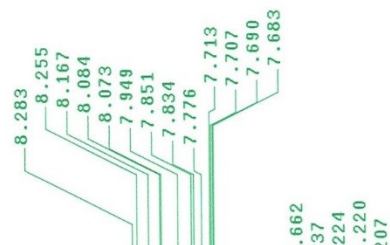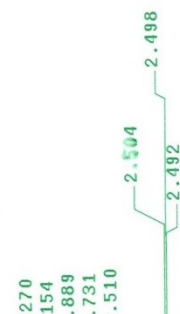

live directory:  
 le directory:  
 file: PROTON  
 Sequence: PROTON (a2pul)  
 nt: dmsc  
 collected on: Feb 22 2017

tor: uovnmars

x. delay 1.000 sec  
 e 45.0 degrees  
 time 2.048 sec  
 h 7998.4 Hz  
 le scan  
 VE H1, 499.9072797 MHz  
 PROCESSING  
 broadening 0.5 Hz  
 ze 32768  
 time 0 min 3 sec

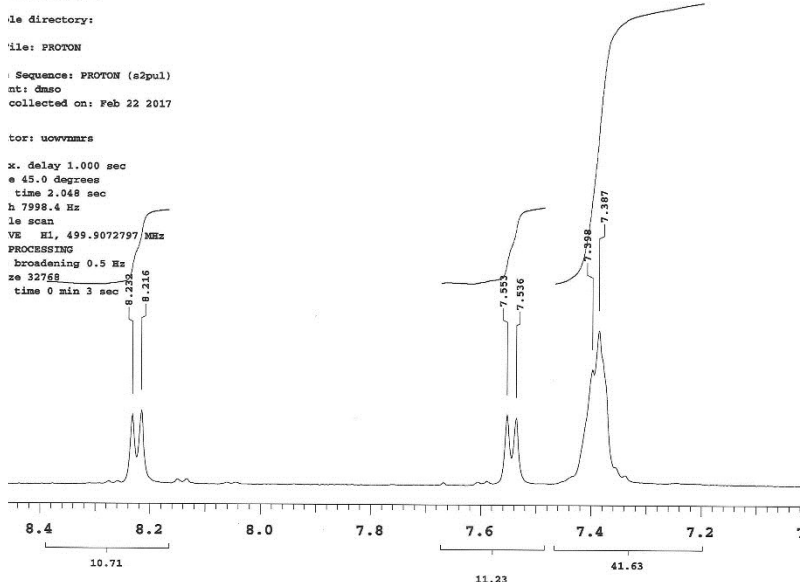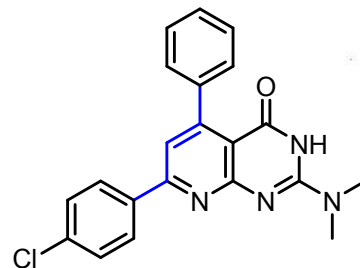

11

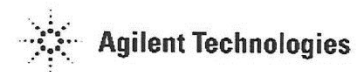

Relax. delay 1.000 sec  
 Pulse 45.0 degrees  
 Acq. time 2.048 sec  
 Width 7998.4 Hz  
 Single scan  
 OBSERVE H1, 499.9072797 MHz  
 DATA PROCESSING  
 Line broadening 0.5 Hz  
 FT size 32768  
 Total time 0 min 3 sec

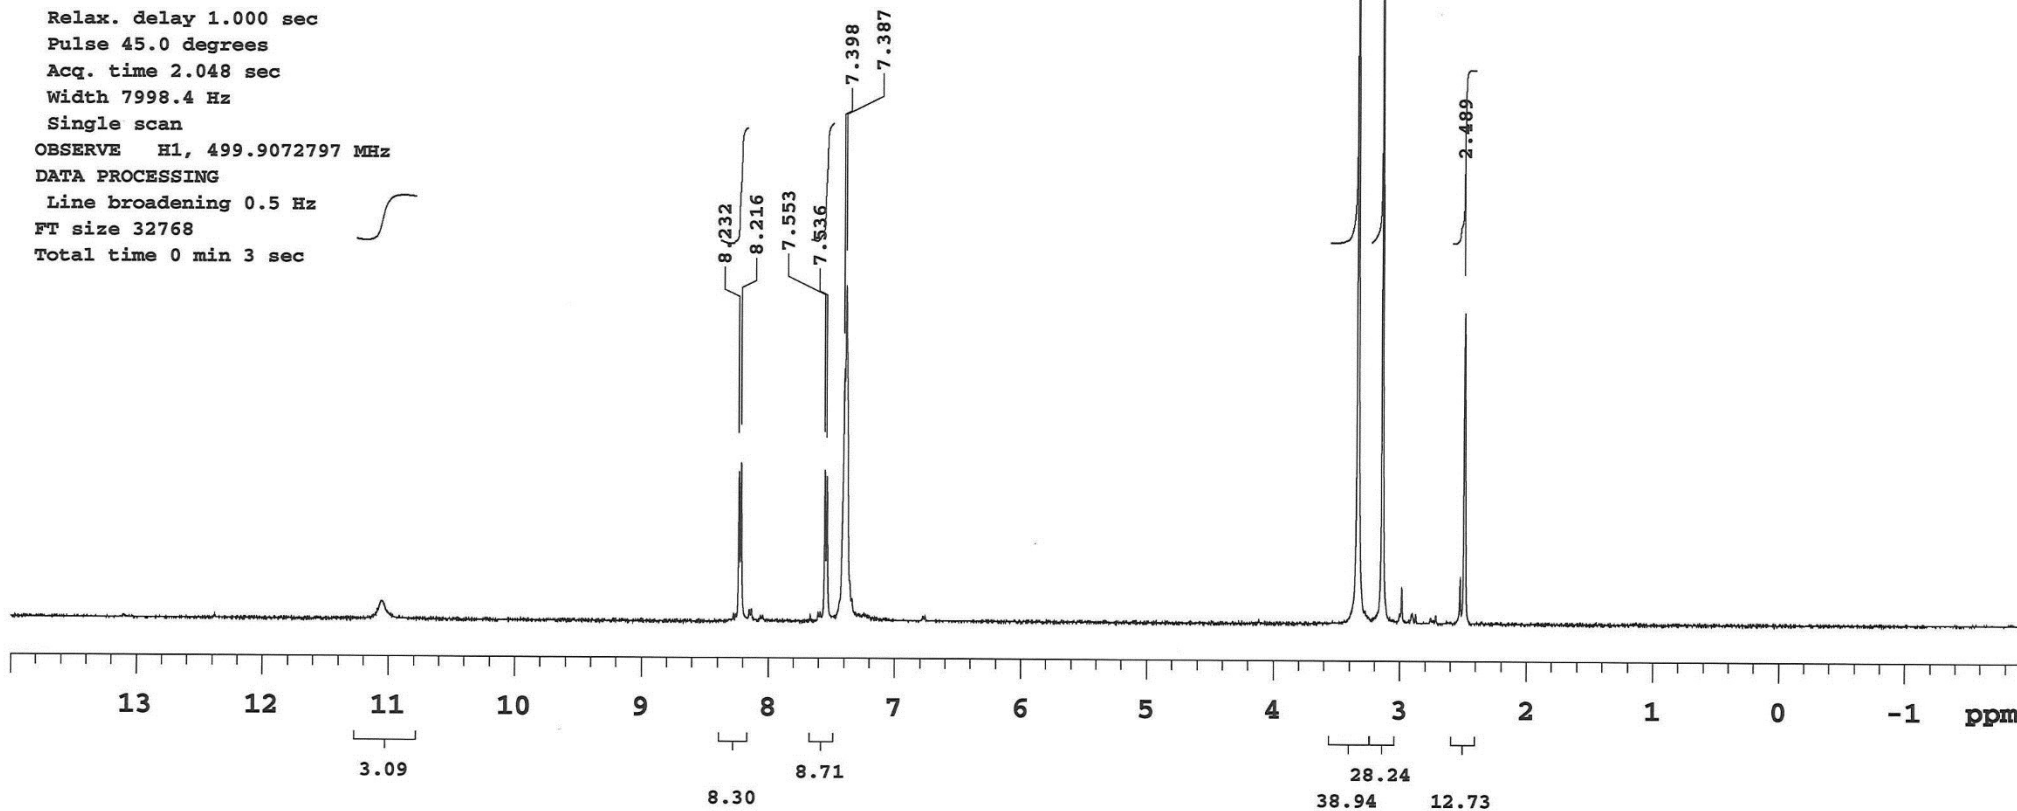



pp dmf 40MMOLE iodine

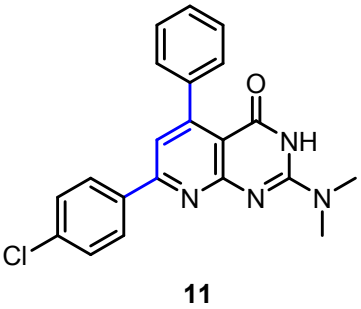

163.1042  
158.6513  
153.8005  
153.5995  
140.2209  
136.9537  
135.4509  
129.7338  
129.2166  
129.0424  
128.1696  
127.8258  
117.4541  
107.7405

37.9754

100.0000

200 150 100 50 0 [ppm]

[rel]  
1.4  
1.2  
1.0  
0.8  
0.6  
0.4  
0.2  
-0.0



File: Proton

Pulse Sequence: s2pu1

Solvent: dmsd  
Temp. 40.0 C / 313.1 K  
Operator: uowvnmrs  
VNMR5-500 "pyne06.domain.com"

Relax. delay 0.001 sec  
Pulse 45.0 degrees  
Acq. time 2.045 sec  
Width 8012.8 Hz  
Single scan  
OBSERVE H1, 499.7437571 MHz  
DATA PROCESSING  
Line broadening 0.5 Hz  
FT size 65536  
Total time 0 min, 2 sec

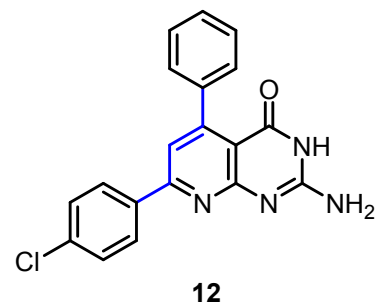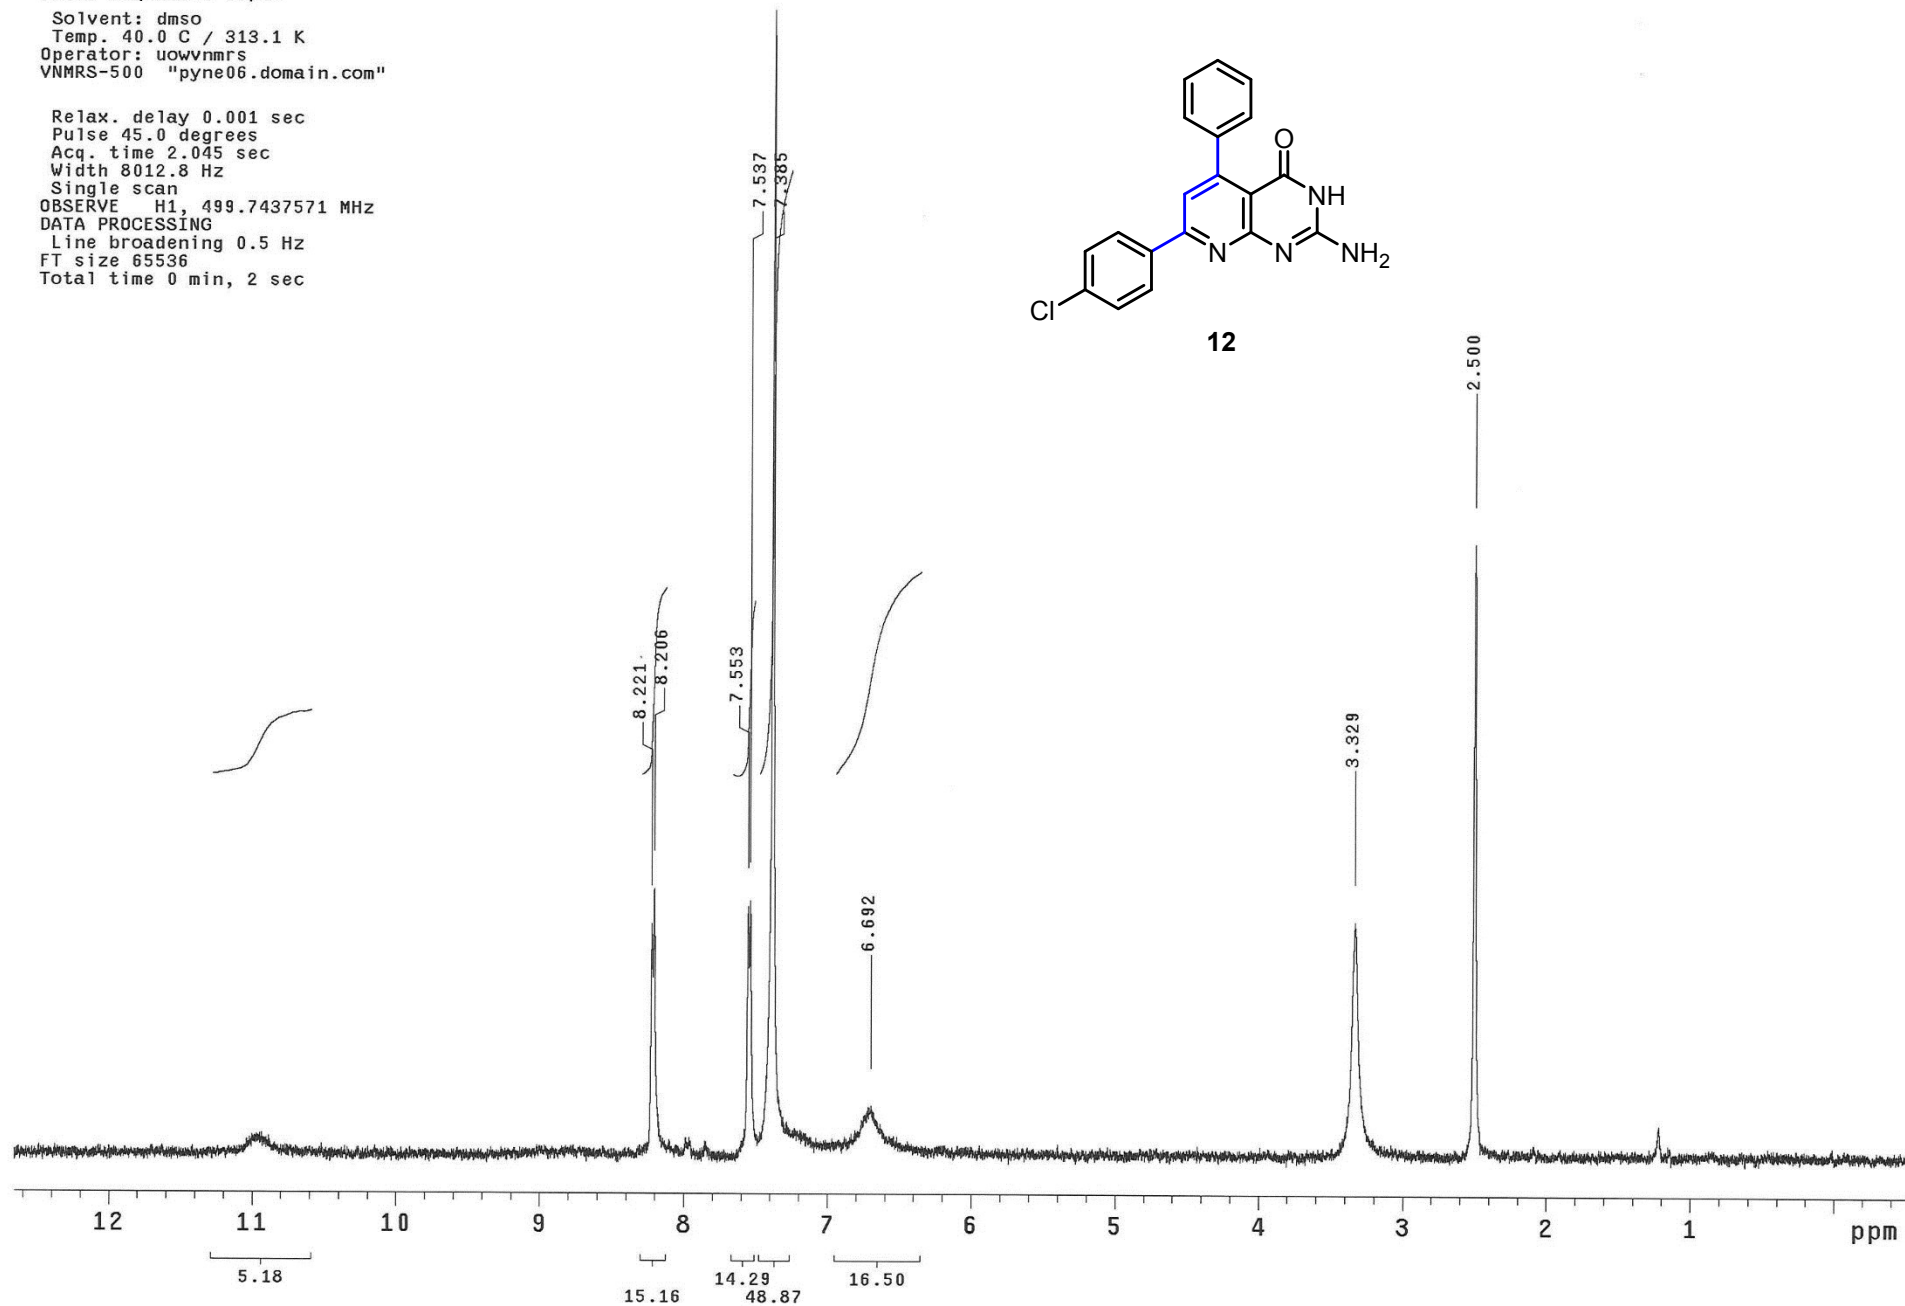

mm170607\_PP\_Formamide\_NH2\_CARBON

Sample Name:

mm170607\_PP\_Formamide\_NH2

Data Collected on:

ernst.sci.uow.edu.au-inova500

Archive directory:

Sample directory:

FidFile: mm170607\_PP\_Formamide\_NH2\_CARBON01

Pulse Sequence: CARBON (s2pul)

Solvent: dmsO

Data collected on: Jun 7 2017

Temp. 25.0 C / 298.1 K

Operator: uowvnmrs

Relax. delay 1.000 sec

Pulse 45.0 degrees

Acq. time 1.043 sec

Width 31421.8 Hz

17460 repetitions

OBSERVE C13, 125.7017855 MHz

DECOUPLE H1, 499.9097792 MHz

Power 42 dB

continuously on

WALTZ-16 modulated

DATA PROCESSING

Line broadening 0.5 Hz

FT size 65536

Total time 9 hr, 57 min

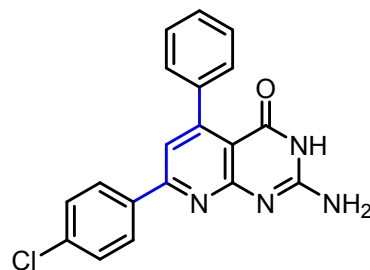

12

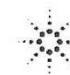

Agilent Technologies

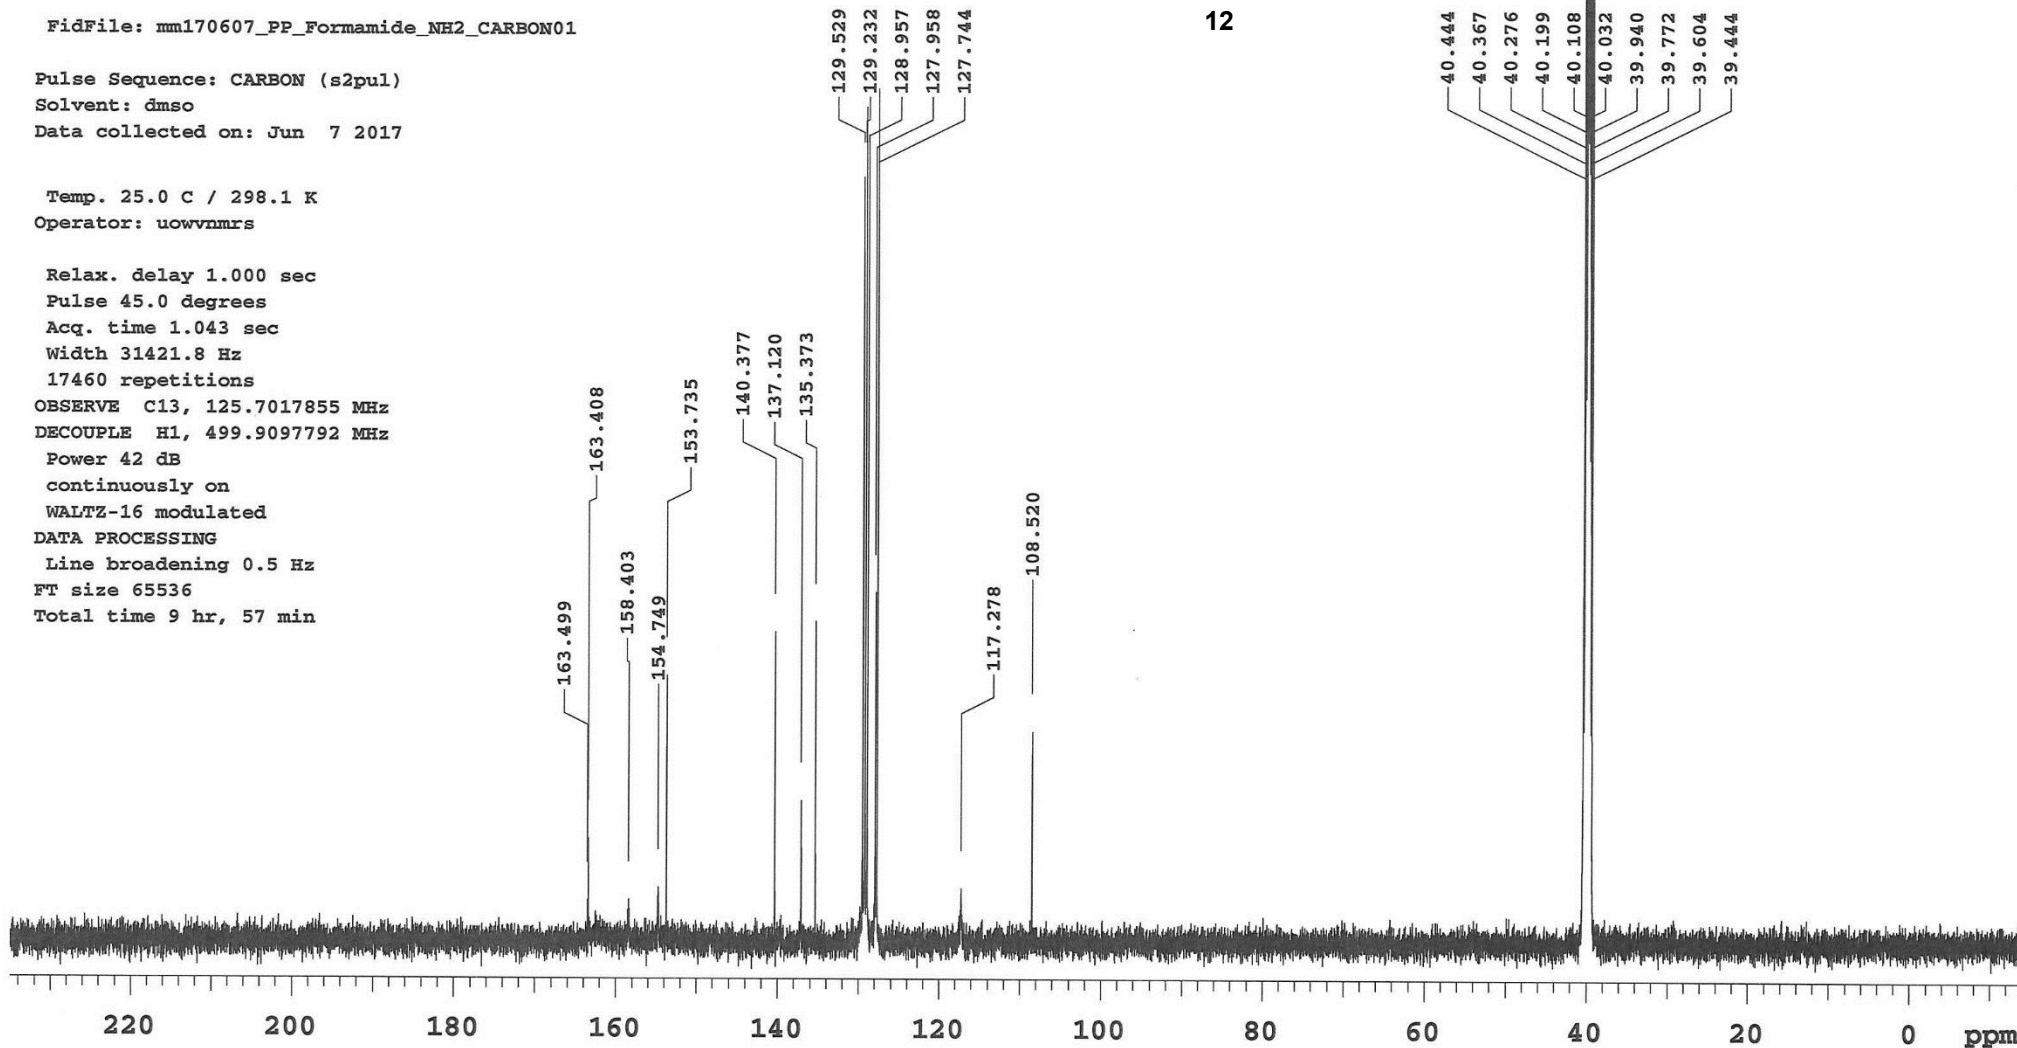

Supplement: c8ob00627j1.pdf [file c8ob00627j1.pdf]
